# Supplementary material for: Multifunctional organometallic compounds for the treatment of Chagas disease: Re(i) tricarbonyl compounds with two different bioactive ligands
Source: Royal Society of Chemistry journal article supplement (doi:10.1039/d2dt03869b), 2023-01-01
Supplement: d2dt03869b1.pdf [file d2dt03869b1.pdf]

## Multifunctional organometallic compounds for the treatment of Chagas Disease: Re(I) tricarbonyl compounds with two different bioactive ligands

Mariano Soba<sup>1,2</sup>, Gonzalo Scalese<sup>1</sup>, Federico Casuriaga<sup>1</sup>, Nicolás Pérez<sup>1</sup>, Nicolás Veiga<sup>1</sup>, Gustavo A. Echeverría<sup>3</sup>, Oscar E. Piro<sup>3</sup>, Ricardo Faccio<sup>4</sup>, Leticia Pérez-Díaz<sup>5</sup>, Gilles Gasser<sup>6</sup>, Ignacio Machado<sup>7\*</sup>, Dinorah Gambino<sup>1\*</sup>

<sup>1</sup>Área Química Inorgánica, DEC, Facultad de Química, Universidad de la República, Uruguay

<sup>2</sup>Programa de Posgrado en Química, Facultad de Química, Universidad de la República, Montevideo, Uruguay

<sup>3</sup>Departamento de Física, Facultad de Ciencias Exactas, Universidad Nacional de La Plata and Institute IFLP (CONICET, CCT-La Plata), La Plata, Argentina

<sup>4</sup>Área Física, DETEMA, Facultad de Química, Universidad de la República, Uruguay

<sup>5</sup>Laboratorio de Interacciones Moleculares, Facultad de Ciencias, Universidad de la República, Uruguay

<sup>6</sup>Chimie ParisTech, PSL University, CNRS, Institute of Chemistry for Life and Health Sciences, Laboratory for Inorganic Chemical Biology, France.

<sup>7</sup>Área Química Analítica, DEC, Facultad de Química, Universidad de la República, Uruguay

\* To whom correspondence should be addressed. E-mail: [dgambino@fq.edu.uy](mailto:dgambino@fq.edu.uy); [imachado@fq.edu.uy](mailto:imachado@fq.edu.uy) Tel. +5982-9249739; fax: +5982-9241906

### Table of contents

**Table S1.** Crystal data and structure refinement for the triclinic and monoclinic polymorphs of *fac*-[Re(I)(CO)<sub>3</sub>(phen)(CTZ)](PF<sub>6</sub>).

**Table S2.** Gradient conditions for RP-HPLC-DAD analysis.

**Table S3a.** Bond lengths [Å] and angles [°] around the metal in [Re(I)(CO)<sub>3</sub>(phen)(CTZ)] complex of *fac*-[Re(I)(CO)<sub>3</sub>(phen)(CTZ)](PF<sub>6</sub>) triclinic polymorph.

**Table S3b.** Bond lengths [Å] and angles [°] around the metal in the two [Re(I)(CO)<sub>3</sub>(phen)(CTZ)] conformers of *fac*-[Re(I)(CO)<sub>3</sub>(phen)(CTZ)](PF<sub>6</sub>) monoclinic polymorph.

**Table S4.** Integrated area of HPLC peaks for the analysis of *fac*-[Re(I)(CO)<sub>3</sub>(NN)(CTZ)](PF<sub>6</sub>) compounds and caffeine (internal standard) after different times of incubation with human plasma (t in hours).

**Table S5.** Molecular docking results.

**Fig S1.** Numbering scheme of the ligands for <sup>1</sup>H-NMR assignment.

**Fig. S2.** (A) <sup>1</sup>H-NMR spectra (B) <sup>1</sup>H-<sup>1</sup>H NMR experiments and (C) <sup>1</sup>H-<sup>13</sup>C NMR experiments for *fac*-[Re(I)(CO)<sub>3</sub>(phen)(CTZ)](PF<sub>6</sub>) complex.

**Fig. S3.** (A)  $^1\text{H}$ -NMR spectra (B)  $^1\text{H}$ - $^1\text{H}$  NMR experiments and (C)  $^1\text{H}$ - $^{13}\text{C}$  NMR experiments for *fac*- $[\text{Re}(\text{I})(\text{CO})_3(\text{aminophen})(\text{CTZ})](\text{PF}_6)$  complex.

**Fig. S4.** (A)  $^1\text{H}$ -NMR spectra (B)  $^1\text{H}$ - $^1\text{H}$  NMR experiments and (C)  $^1\text{H}$ - $^{13}\text{C}$  NMR experiments for *fac*- $[\text{Re}(\text{I})(\text{CO})_3(\text{bipy})(\text{CTZ})](\text{PF}_6)$  complex.

**Fig. S5.** (A)  $^1\text{H}$ -NMR spectra (B)  $^1\text{H}$ - $^1\text{H}$  NMR experiments and (C)  $^1\text{H}$ - $^{13}\text{C}$  NMR experiments for *fac*- $[\text{Re}(\text{I})(\text{CO})_3(\text{tmp})(\text{CTZ})](\text{PF}_6)$  complex.

**Fig. S6.** (A)  $^1\text{H}$ -NMR spectra (B)  $^1\text{H}$ - $^1\text{H}$  NMR experiments and (C)  $^1\text{H}$ - $^{13}\text{C}$  NMR experiments for *fac*- $[\text{Re}(\text{I})(\text{CO})_3(\text{dmb})(\text{CTZ})](\text{PF}_6)$  complex.

**Fig. S7.** (A)  $^1\text{H}$ -NMR spectra (B)  $^1\text{H}$ - $^1\text{H}$  NMR experiments and (C)  $^1\text{H}$ - $^{13}\text{C}$  NMR experiments for *fac*- $[\text{Re}(\text{I})(\text{CO})_3(\text{tmp})(\text{KTZ})](\text{PF}_6)$  complex.

**Fig. S8.** Chromatograms obtained in DMSO:fetal bovine serum (50:50) for *fac*- $[\text{Re}(\text{I})(\text{CO})_3(\text{aminophen})(\text{CTZ})](\text{PF}_6)$  (a), *fac*- $[\text{Re}(\text{I})(\text{CO})_3(\text{dmb})(\text{CTZ})](\text{PF}_6)$  (b) and *fac*- $[\text{Re}(\text{I})(\text{CO})_3(\text{bipy})(\text{CTZ})](\text{PF}_6)$  (c). Subscripts 1 and 2 correspond to  $t_1 = 0$  and  $t_2 = 1$  day, respectively.

**Fig. S9.** Chromatograms obtained in DMSO:fetal bovine serum (50:50) for *fac*- $[\text{Re}(\text{I})(\text{CO})_3(\text{tmp})(\text{CTZ})](\text{PF}_6)$  (d), *fac*- $[\text{Re}(\text{I})(\text{CO})_3(\text{phen})(\text{CTZ})](\text{PF}_6)$  (e) and *fac*- $[\text{Re}(\text{I})(\text{CO})_3(\text{tmp})(\text{KTZ})](\text{PF}_6)$  (f). Subscripts 1 and 2 correspond to  $t_1 = 0$  and  $t_2 = 1$  day, respectively.

**Fig. S10.** Electronic absorption spectra of Re-CTZ-tmp in the absence (black line) and in the presence (color lines) of CT-DNA. The arrow shows the changes upon addition of increasing amount of CT-DNA. ( $C_{\text{DNA}} = 0\text{-}20 \mu\text{M}$ ,  $C_{\text{complex}} = 10 \mu\text{M}$ , samples prepared in DMSO/buffer Tris HCl medium, pH 7.4).

**Fig. S11.** Fluorescence data obtained for the competitive binding study of  $[\text{Re}(\text{CO})_3(\text{tmp})(\text{CTZ})]\text{PF}_6$  to {EB-DNA} adduct ( $\lambda_{\text{exc.}} = 510 \text{ nm}$ ).

**Fig. S12.** Docking solutions for *fac*- $[\text{Re}(\text{I})(\text{CO})_3(\text{NN})(\text{CTZ})]^+$  using CT-DNA as receptor. NN = phen (a), aminophen (b), bipy (c), dmb (d), tmp (e). The solvent-accessible surface is depicted for the receptor, with the interpolated atomic charges mapped on it. The RMSD between the solutions is also depicted. Atom color code: C (grey), N (blue), O (red), Cl (green), H (white).

**Fig. S13.** Best ranking pose for *fac*- $[\text{Re}(\text{I})(\text{CO})_3(\text{NN})(\text{CTZ})]^+$  docked into the major groove of CT-DNA. NN = bipy (a), dmb (b), tmp (c). In all cases, the solvent-accessible surface is depicted for the receptor, with the interpolated atomic charges mapped on it. In (d) - (f), the intermolecular interactions between the substrate and the ct-DNA are shown for (a) - (c), respectively. Pi-sigma = C-H- $\pi$  interaction; conventional = conventional H-bond; Carbon = C-H H-bond. Atom color code: C (grey), N (blue), O (red), Cl (green), H (white).

**Fig. S14.** a) Intermolecular interactions between the crystallized fluconazole and the receptor, represented as colored dashed lines. Atom color code: C (grey), N (blue), O (red), Cl (green), H (white). b) Redocking results for fluconazole. The crystallized fluconazole molecule is superimposed in green.

**Table S1.** Crystal data and structure refinement for the triclinic and monoclinic polymorphs of *fac*-[Re(I)(CO)<sub>3</sub>(phen)(CTZ)](PF<sub>6</sub>).

| <b>Polymorph</b>                             | <b>Triclinic</b>                                                                  | <b>Monoclinic</b>                                                                 |
|----------------------------------------------|-----------------------------------------------------------------------------------|-----------------------------------------------------------------------------------|
| Empirical formula                            | C <sub>37</sub> H <sub>25</sub> ClF <sub>6</sub> N <sub>4</sub> O <sub>3</sub> Re | C <sub>37</sub> H <sub>25</sub> ClF <sub>6</sub> N <sub>4</sub> O <sub>3</sub> Re |
| Formula weight                               | 940.23                                                                            | 940.23                                                                            |
| Temperature (K)                              | 297(2)                                                                            | 297(2)                                                                            |
| Wavelength (Å)                               | 0.71073                                                                           | 0.71073                                                                           |
| Crystal system                               | Triclinic                                                                         | Monoclinic                                                                        |
| Space group                                  | P-1                                                                               | P2 <sub>1</sub> /n                                                                |
| Unit cell dimensions                         |                                                                                   |                                                                                   |
| a (Å)                                        | 11.3683(3)                                                                        | 19.2076(6)                                                                        |
| b (Å)                                        | 12.1500(3)                                                                        | 11.9631(3)                                                                        |
| c (Å)                                        | 14.2904(4)                                                                        | 32.482(1)                                                                         |
| α (°)                                        | 110.797(2)                                                                        | 90.000                                                                            |
| β (°)                                        | 99.919(2)                                                                         | 104.958(4)                                                                        |
| γ (°)                                        | 103.574(2)                                                                        | 90.000                                                                            |
| Volume (Å <sup>3</sup> )                     | 1721.30(8)                                                                        | 7211.0(4)                                                                         |
| Z, calc. density (Mg/m <sup>3</sup> )        | 2, 1.814                                                                          | 8, 1.732                                                                          |
| Absorption coeff. (mm <sup>-1</sup> )        | 3.731                                                                             | 3.563                                                                             |
| F(000)                                       | 920                                                                               | 3680                                                                              |
| Crystal size (mm <sup>3</sup> )              | 0.440 x 0.407 x 0.200                                                             | 0.472 x 0.252 x 0.143                                                             |
| θ-range for data collect. (°)                | 3.363 to 29.023                                                                   | 2.979 to 26.000                                                                   |
| Index ranges                                 | -15 ≤ h ≤ 15, -16 ≤ k ≤ 15, -17 ≤ l ≤ 17                                          | -23 ≤ h ≤ 13, -14 ≤ k ≤ 14, -33 ≤ l ≤ 39                                          |
| Reflections collected                        | 16130                                                                             | 36391                                                                             |
| Independent reflections                      | 7486 [R(int) = 0.0316]                                                            | 14104 [R(int) = 0.0343]                                                           |
| Obs. reflections [I > 2σ(I)]                 | 6540                                                                              | 10770                                                                             |
| Completeness (%)                             | 99.7 (to θ = 25.242°)                                                             | 99.8 (to θ = 25.242°)                                                             |
| Refinement method                            | Full-matrix least-squares on F <sup>2</sup>                                       | Full-matrix least-squares on F <sup>2</sup>                                       |
| Data / restraints / parameters               | 7486 / 7 / 431                                                                    | 14104 / 0 / 955                                                                   |
| Goodness-of-fit on F <sup>2</sup>            | 1.046                                                                             | 1.138                                                                             |
| Final R indices <sup>a</sup> [I > 2σ(I)]     | R1 = 0.0292, wR2 = 0.0599                                                         | R1 = 0.0403, wR2 = 0.0728                                                         |
| R indices (all data)                         | R1 = 0.0375, wR2 = 0.0632                                                         | R1 = 0.0631, wR2 = 0.0855                                                         |
| Larg. diff. peak & hole (e.Å <sup>-3</sup> ) | 1.015 and -0.912                                                                  | 0.996 and -1.924                                                                  |

$$^a R_1 = \frac{\sum ||F_o| - |F_c||}{\sum |F_o|}, wR_2 = \left[ \frac{\sum w(|F_o|^2 - |F_c|^2)^2}{\sum w(|F_o|^2)^2} \right]^{1/2}$$

**Table S2.** Gradient conditions for RP-HPLC-DAD analysis.

| <b>Time (min)</b> | <b>A (%)</b> | <b>B (%)</b> |
|-------------------|--------------|--------------|
| 0 – 3             | 100          | 0            |
| 3 – 6             | 100 – 75     | 0 – 25       |
| 6 – 9             | 75 – 66      | 25 – 34      |
| 9 – 20            | 66 – 0       | 34 – 100     |
| 20 – 27           | 0            | 100          |
| 27 – 30           | 0 – 100      | 100 – 0      |

**Table S3a.** Bond lengths [ $\text{\AA}$ ] and angles [ $^\circ$ ] around the metal in  $[\text{Re}(\text{I})(\text{CO})_3(\text{phen})(\text{CTZ})]$  complex of *fac*- $[\text{Re}(\text{I})(\text{CO})_3(\text{phen})(\text{CTZ})](\text{PF}_6)$  triclinic polymorph.

|               |          |                |          |
|---------------|----------|----------------|----------|
| C(1)-Re       | 1.923(4) | C(3)-Re-N(2A)  | 171.7(1) |
| C(2)-Re       | 1.900(4) | C(1)-Re-N(2A)  | 93.0(1)  |
| C(3)-Re       | 1.924(4) | C(2)-Re-N(2B)  | 171.3(1) |
| N(1A)-Re      | 2.190(3) | C(3)-Re-N(2B)  | 96.3(2)  |
| N(2A)-Re      | 2.171(3) | C(1)-Re-N(2B)  | 98.2(1)  |
| N(2B)-Re      | 2.179(3) | N(2A)-Re-N(2B) | 75.4(1)  |
|               |          | C(2)-Re-N(1A)  | 90.7(1)  |
| C(2)-Re-C(3)  | 89.3(2)  | C(3)-Re-N(1A)  | 95.0(1)  |
| C(2)-Re-C(1)  | 88.5(2)  | C(1)-Re-N(1A)  | 176.6(1) |
| C(3)-Re-C(1)  | 88.3(2)  | N(2A)-Re-N(1A) | 83.88(9) |
| C(2)-Re-N(2A) | 98.9(1)  | N(2B)-Re-N(1A) | 82.3(1)  |

**Table S3b.** Bond lengths [ $\text{\AA}$ ] and angles [ $^\circ$ ] around the metal in the two  $[\text{Re}(\text{I})(\text{CO})_3(\text{phen})(\text{CTZ})]$  conformers of *fac*- $[\text{Re}(\text{I})(\text{CO})_3(\text{phen})(\text{CTZ})](\text{PF}_6)$  monoclinic polymorph.

| Conformer 1         |          | Conformer 2         |          |
|---------------------|----------|---------------------|----------|
| C(11)-Re(1)         | 1.907(6) | C(21)-Re(2)         | 1.900(6) |
| C(12)-Re(1)         | 1.908(6) | C(22)-Re(2)         | 1.923(6) |
| C(13)-Re(1)         | 1.924(6) | C(23)-Re(2)         | 1.919(6) |
| N(11A)-Re(1)        | 2.183(4) | N(21A)-Re(2)        | 2.177(4) |
| N(12A)-Re(1)        | 2.175(4) | N(22A)-Re(2)        | 2.178(4) |
| N(12B)-Re(1)        | 2.177(4) | N(22B)-Re(2)        | 2.179(4) |
|                     |          |                     |          |
| C(11)-Re(1)-C(12)   | 86.6(2)  | C(21)-Re(2)-C(22)   | 86.9(2)  |
| C(11)-Re(1)-C(13)   | 89.4(2)  | C(21)-Re(2)-C(23)   | 87.4(2)  |
| C(12)-Re(1)-C(13)   | 87.1(2)  | C(22)-Re(2)-C(23)   | 88.1(2)  |
| C(11)-Re(1)-N(12A)  | 92.1(2)  | C(21)-Re(2)-N(22A)  | 95.8(2)  |
| C(12)-Re(1)-N(12A)  | 99.9(2)  | C(22)-Re(2)-N(22A)  | 97.8(2)  |
| C(13)-Re(1)-N(12A)  | 172.9(2) | C(23)-Re(2)-N(22A)  | 173.3(2) |
| C(11)-Re(1)-N(12B)  | 98.7(2)  | C(21)-Re(2)-N(22B)  | 93.6(2)  |
| C(12)-Re(1)-N(12B)  | 173.1(2) | C(22)-Re(2)-N(22B)  | 173.3(2) |
| C(13)-Re(1)-N(12B)  | 97.3(2)  | C(23)-Re(2)-N(22B)  | 98.5(2)  |
| N(12A)-Re(1)-N(12B) | 75.6(2)  | N(22A)-Re(2)-N(22B) | 75.5(2)  |
| C(11)-Re(1)-N(11A)  | 175.5(2) | C(21)-Re(2)-N(21A)  | 178.2(2) |
| C(12)-Re(1)-N(11A)  | 92.2(2)  | C(22)-Re(2)-N(21A)  | 93.8(2)  |
| C(13)-Re(1)-N(11A)  | 94.9(2)  | C(23)-Re(2)-N(21A)  | 94.2(2)  |
| N(12A)-Re(1)-N(11A) | 83.8(2)  | N(22A)-Re(2)-N(21A) | 82.5(2)  |
| N(12B)-Re(1)-N(11A) | 82.2(2)  | N(22B)-Re(2)-N(21A) | 85.5(2)  |

**Table S4.** Integrated area of HPLC peaks for the analysis of *fac*-[Re(I)(CO)<sub>3</sub>(NN)(CTZ)](PF<sub>6</sub>) compounds and caffeine (internal standard) after different times of incubation with human plasma (t in hours).

| Compound                                                                                          | A <sub>Compound</sub> | A <sub>Caffein</sub><br>(t <sub>R</sub> = 3.159) | A <sub>Compound</sub> /A <sub>Caffein</sub> |
|---------------------------------------------------------------------------------------------------|-----------------------|--------------------------------------------------|---------------------------------------------|
| Blank t=0                                                                                         | -                     | 460.37                                           | -                                           |
| Blank t=24                                                                                        | -                     | 12.65                                            | -                                           |
| <b><i>fac</i>-[Re(I)(CO)<sub>3</sub>(tmp)(CTZ)](PF<sub>6</sub>)<br/>(t<sub>R</sub> = 2.599)</b>   |                       |                                                  |                                             |
| t=0                                                                                               | 718.15                | 716.12                                           | 1.0                                         |
| t=1                                                                                               | 620.40                | 620.92                                           | 1.0                                         |
| t=3                                                                                               | 583.81                | 525.19                                           | 1.1                                         |
| t=6                                                                                               | 423.42                | 373.48                                           | 1.1                                         |
| t=24                                                                                              | 344.10                | 382.26                                           | 0.9                                         |
| <b><i>fac</i>-[Re(I)(CO)<sub>3</sub>(dmb)(CTZ)](PF<sub>6</sub>)<br/>(t<sub>R</sub> = 1.838)</b>   |                       |                                                  |                                             |
| t=0                                                                                               | 374.67                | 426.74                                           | 0.9                                         |
| t=1                                                                                               | 275.11                | 225.67                                           | 1.2                                         |
| t=3                                                                                               | 288.95                | 258.31                                           | 1.1                                         |
| t=6                                                                                               | 429.38                | 344.59                                           | 1.2                                         |
| t=24                                                                                              | 292.39                | 263.15                                           | 1.1                                         |
| <b><i>fac</i>-[Re(I)(CO)<sub>3</sub>(bipy)(CTZ)](PF<sub>6</sub>)<br/>(t<sub>R</sub> = 1.778)</b>  |                       |                                                  |                                             |
| t=0                                                                                               | 431.89                | 400.43                                           | 1.1                                         |
| t=1                                                                                               | 426.02                | 421.83                                           | 1.0                                         |
| t=3                                                                                               | 456.18                | 480.07                                           | 1.0                                         |
| t=6                                                                                               | 519.30                | 428.57                                           | 1.2                                         |
| t=24                                                                                              | 420.12                | 381.68                                           | 1.1                                         |
| <b><i>fac</i>-[Re(I)(CO)<sub>3</sub>(phen)(CTZ)](PF<sub>6</sub>)<br/>(t<sub>R</sub> = 1.774)</b>  |                       |                                                  |                                             |
| t=0                                                                                               | 393.10                | 394.55                                           | 1.0                                         |
| t=1                                                                                               | 284.25                | 242.26                                           | 1.2                                         |
| t=3                                                                                               | 754.83                | 554.74                                           | 1.4                                         |
| t=6                                                                                               | 545.46                | 458.02                                           | 1.2                                         |
| t=24                                                                                              | 314.31                | 292.41                                           | 1.1                                         |
| <b><i>fac</i>-[Re(I)(CO)<sub>3</sub>(amino)(CTZ)](PF<sub>6</sub>)<br/>(t<sub>R</sub> = 1.745)</b> |                       |                                                  |                                             |
| t=0                                                                                               | 354.63                | 406.65                                           | 0.9                                         |
| t=1                                                                                               | 288.59                | 393.05                                           | 0.7                                         |
| t=3                                                                                               | 121.97                | 174.36                                           | 0.7                                         |
| t=6                                                                                               | 247.62                | 332.45                                           | 0.7                                         |
| t=24                                                                                              | 377.81                | 477.84                                           | 0.8                                         |
| <b><i>fac</i>-[Re(I)(CO)<sub>3</sub>(tmp)(KTZ)](PF<sub>6</sub>)<br/>(t<sub>R</sub> = 1.791)</b>   |                       |                                                  |                                             |
| t=0                                                                                               | 811.75                | 299.05                                           | 3.0                                         |

|                                    |                           |        |             |
|------------------------------------|---------------------------|--------|-------------|
| t=1                                | 1059.71                   | 321.89 | 3.3         |
| t=3                                | 576.42<br>256.38 (peak 2) | 367.31 | <b>1.6*</b> |
| t=6                                | 536.04<br>256.71 (peak 2) | 292.11 | <b>1.8*</b> |
| t=24                               | 628.32<br>656.40 (peak 2) | 462.74 | <b>1.4*</b> |
| <b>CTZ (t<sub>R</sub> = 2.047)</b> |                           |        |             |
| t=0                                | 19.5                      | 403.39 | 0.05        |
| t=1                                | 21.2                      | 468.87 | 0.05        |
| t=3                                | 18.7                      | 366.52 | 0.05        |
| t=6                                | 15.3                      | 276.71 | 0.06        |
| t=24                               | 16.7                      | 279.93 | 0.06        |

(\*): shows the incubation times where the compound started to decompose, as demonstrated by the diminution of the main peak area, and the appearance of a 2<sup>nd</sup> peak. A = area under the peak.

**Table S5.** Molecular docking results.

| Receptor                                                           | Substrate                                           | Chemscore | $\Delta G_{\text{bind}}$<br>(kJ/mol) <sup>a</sup> | Chemscore terms <sup>b</sup> |                         |               |       |
|--------------------------------------------------------------------|-----------------------------------------------------|-----------|---------------------------------------------------|------------------------------|-------------------------|---------------|-------|
|                                                                    |                                                     |           |                                                   | H-bonds                      | Lipophilic interactions | entropic loss | Clash |
| CT-DNA                                                             | [Re(CO) <sub>3</sub> (phen)(CTZ)] <sup>+</sup>      | 17.5      | -17.5                                             | 1.98                         | 74.7                    | 1.29          | 0.04  |
|                                                                    | [Re(CO) <sub>3</sub> (aminophen)(CTZ)] <sup>+</sup> | 18.7      | -18.9                                             | 2.89                         | 61.5                    | 1.36          | 0.00  |
|                                                                    | [Re(CO) <sub>3</sub> (bipy)(CTZ)] <sup>+</sup>      | 17.5      | -17.7                                             | 1.99                         | 76.1                    | 1.30          | 0.04  |
|                                                                    | [Re(CO) <sub>3</sub> (dmb)(CTZ)] <sup>+</sup>       | 18.0      | -18.2                                             | 1.99                         | 79.4                    | 1.27          | 0.17  |
|                                                                    | [Re(CO) <sub>3</sub> (tmp)(CTZ)] <sup>+</sup>       | 17.7      | -18.0                                             | 1.98                         | 77.6                    | 1.23          | 0.16  |
| lanosterol<br>14- $\alpha$ -<br>demethylase<br>( <i>T. cruzi</i> ) | CTZ                                                 | 44.6      | -52.2                                             | 0.00                         | 376.9                   | 1.33          | 0.24  |
|                                                                    | [Re(CO) <sub>3</sub> (tmp)(CTZ)] <sup>+</sup>       | 39.4      | -73.6                                             | 0.00                         | 608.9                   | 1.23          | 24.1  |

<sup>a</sup> Estimated by the chemscore scoring function. <sup>b</sup> Chemscore energy terms: receptor-substrate hydrogen bond, lipophilic interactions, entropic loss upon binding, clash penalty and internal ligand strain.



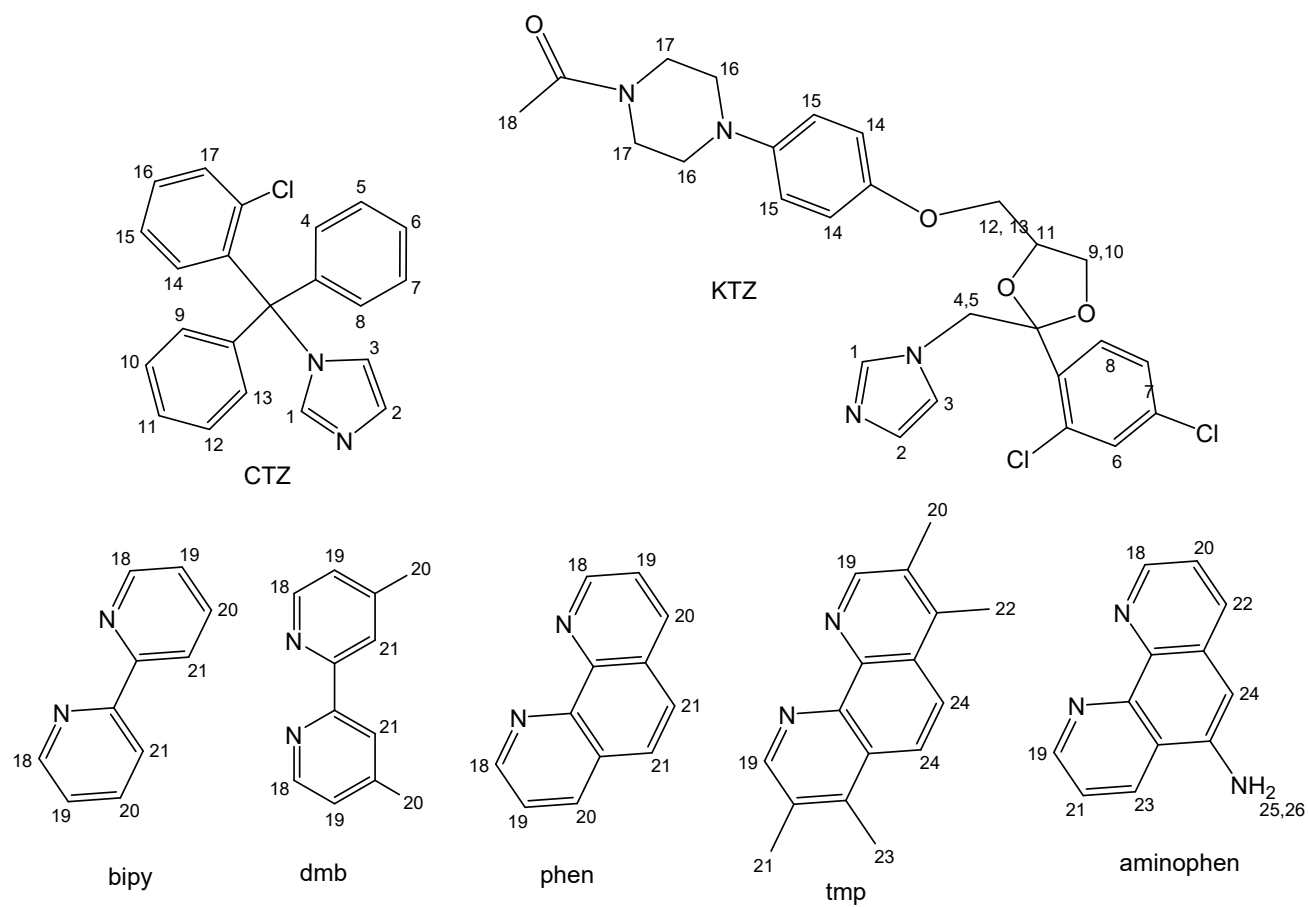

**Fig S1.** Numbering scheme of the ligands for  $^1\text{H-NMR}$  assignment.

(A)  $^1\text{H}$ -RMN

*fac*-[Re(I)(CO)<sub>3</sub>(phen)(CTZ)](PF<sub>6</sub>)

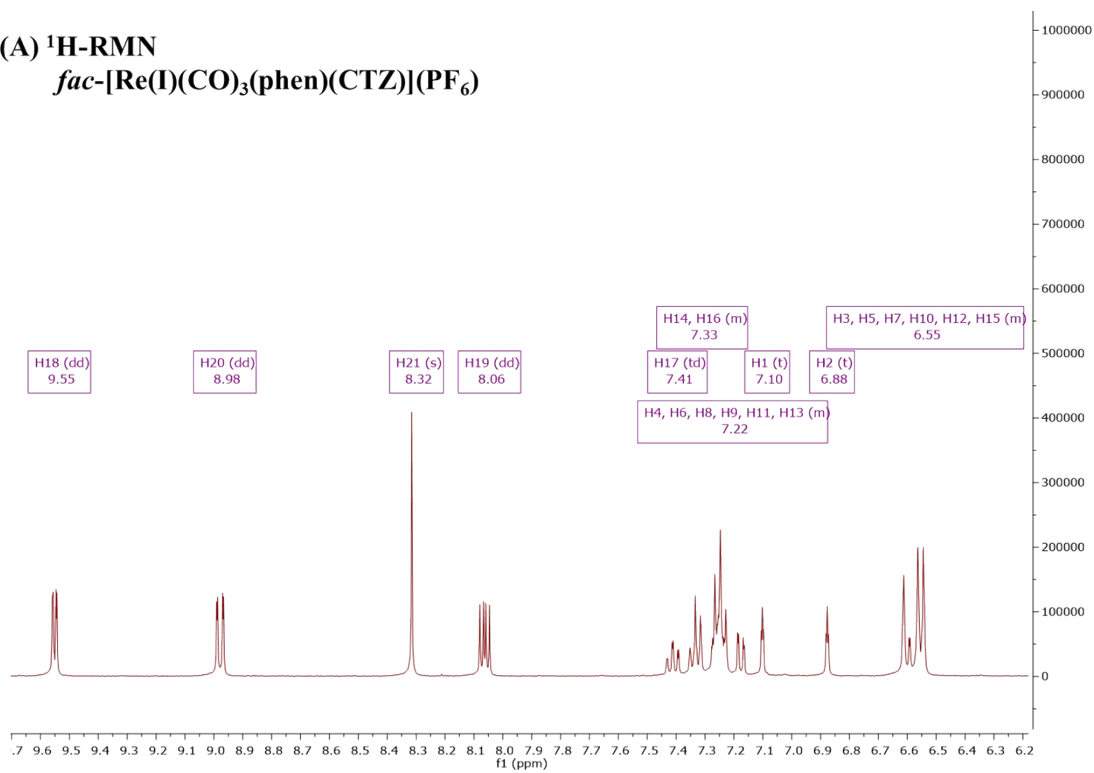

(B)  $^1\text{H}$ - $^1\text{H}$ -COSY

*fac*-[Re(I)(CO)<sub>3</sub>(phen)(CTZ)](PF<sub>6</sub>)

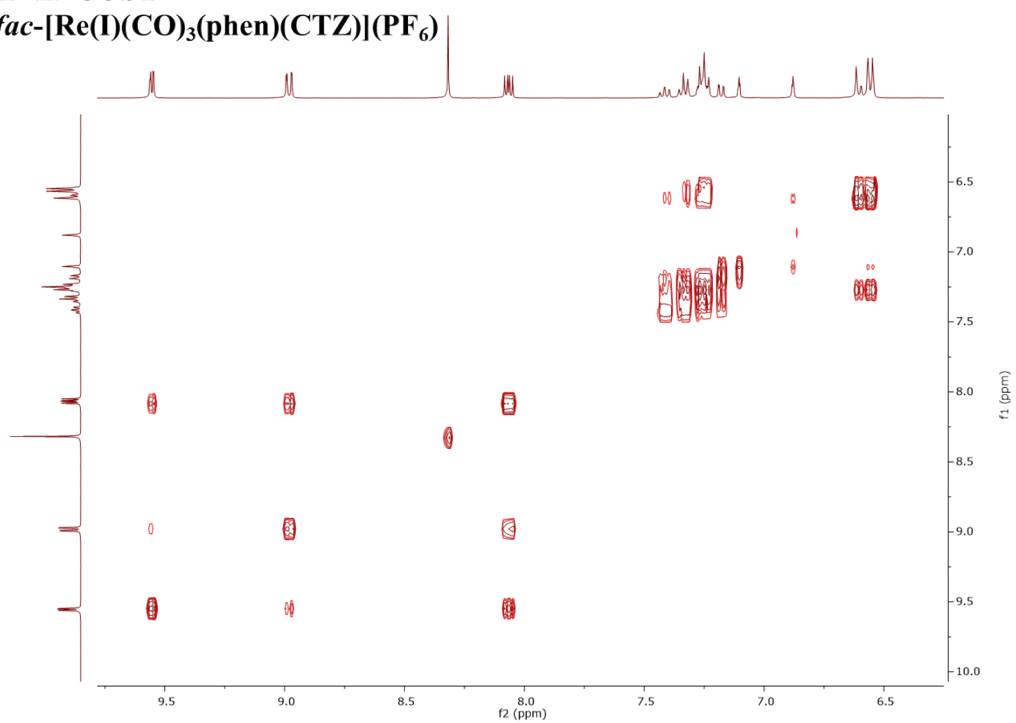

(C)  $^1\text{H}$ - $^{13}\text{C}$ - HSQC  
*fac*-[Re(I)(CO)<sub>3</sub>(phen)(CTZ)](PF<sub>6</sub>)

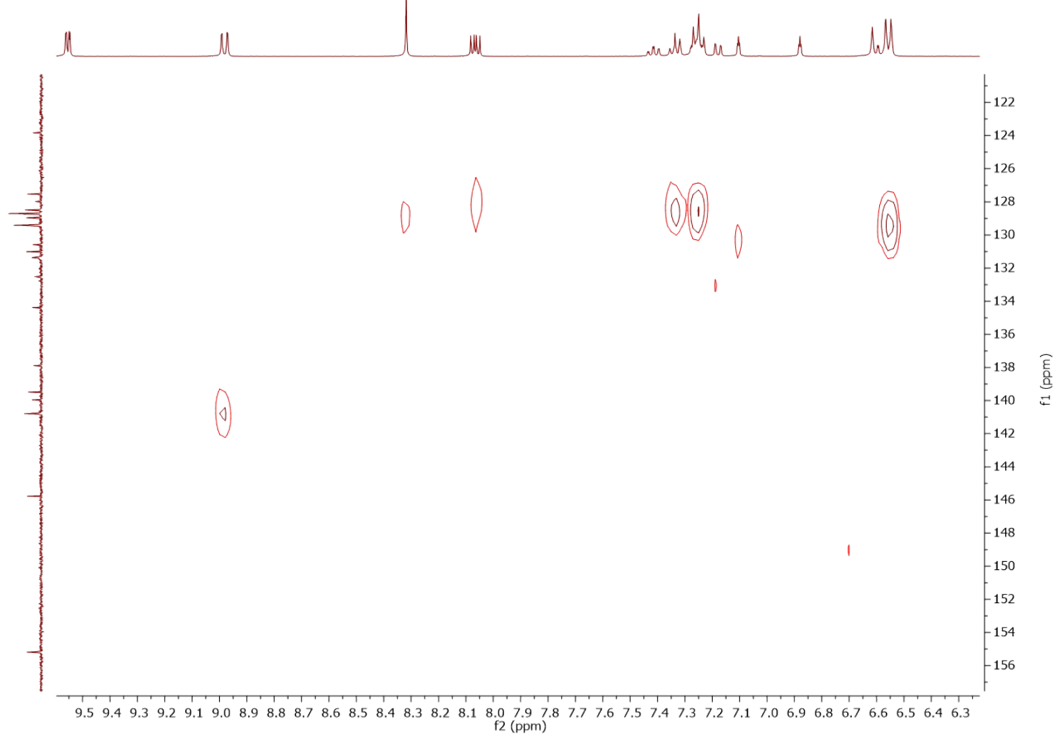

**Fig. S2.** (A)  $^1\text{H}$ -NMR spectra (B)  $^1\text{H}$ - $^1\text{H}$  NMR experiments and (C)  $^1\text{H}$ - $^{13}\text{C}$  NMR experiments for *fac*-[Re(I)(CO)<sub>3</sub>(phen)(CTZ)](PF<sub>6</sub>) complex.

(A)  $^1\text{H}$ -RMN  
*fac*-[Re(I)(CO)<sub>3</sub>(aminophen)(CTZ)](PF<sub>6</sub>)

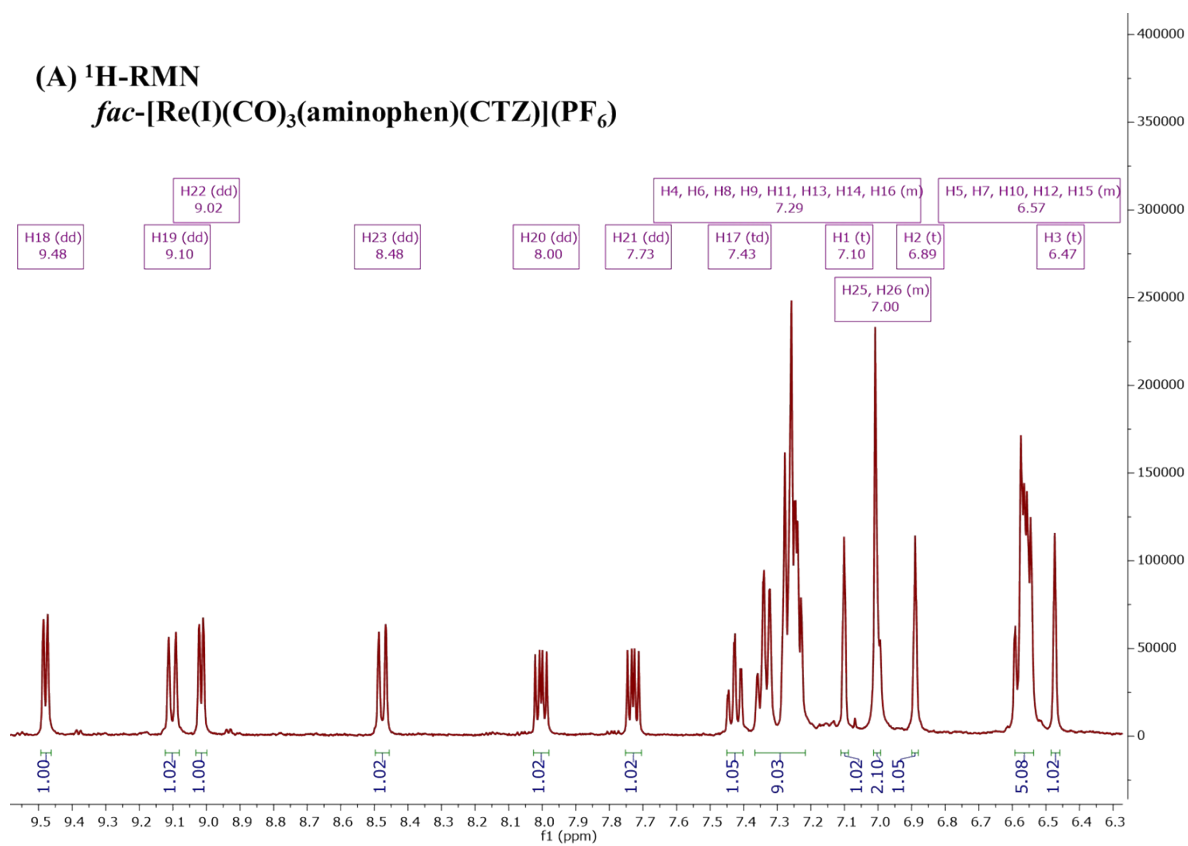

(B)  $^1\text{H}$ - $^1\text{H}$ -COSY  
*fac*-[Re(I)(CO)<sub>3</sub>(aminophen)(CTZ)](PF<sub>6</sub>)

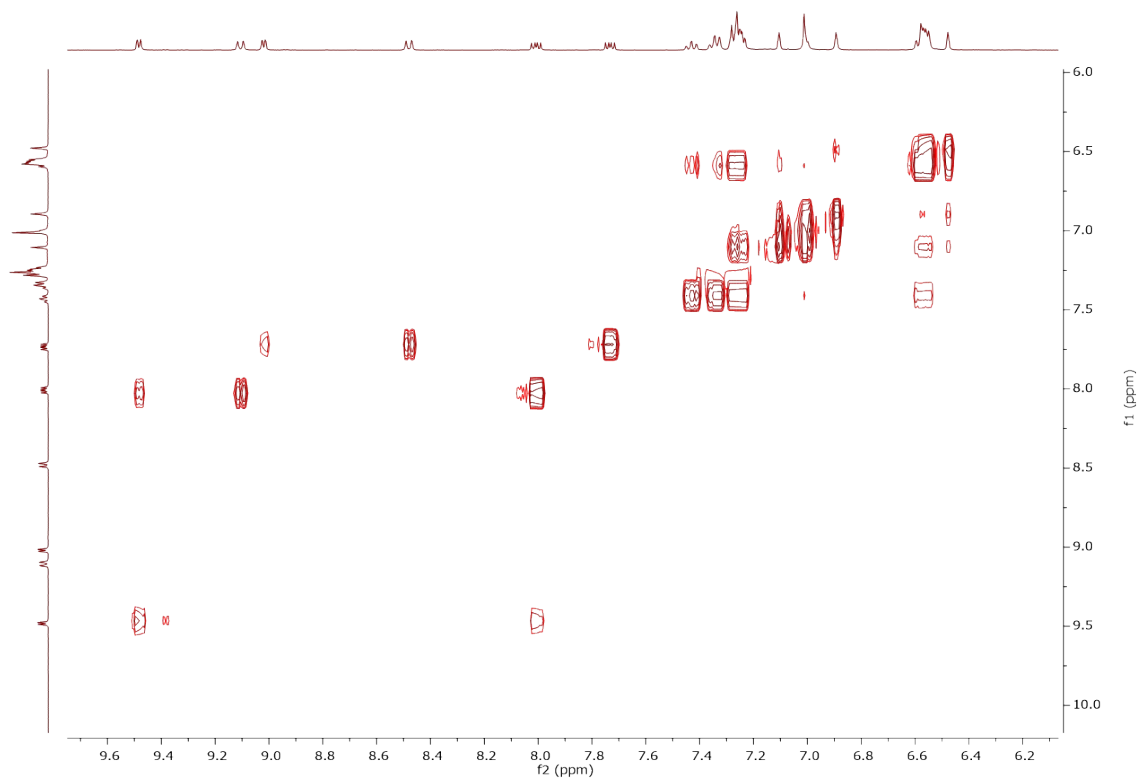

(C)  $^1\text{H}$ - $^{13}\text{C}$ -HSQC  
*fac*-[Re(I)(CO)<sub>3</sub>(aminophen)(CTZ)](PF<sub>6</sub>)

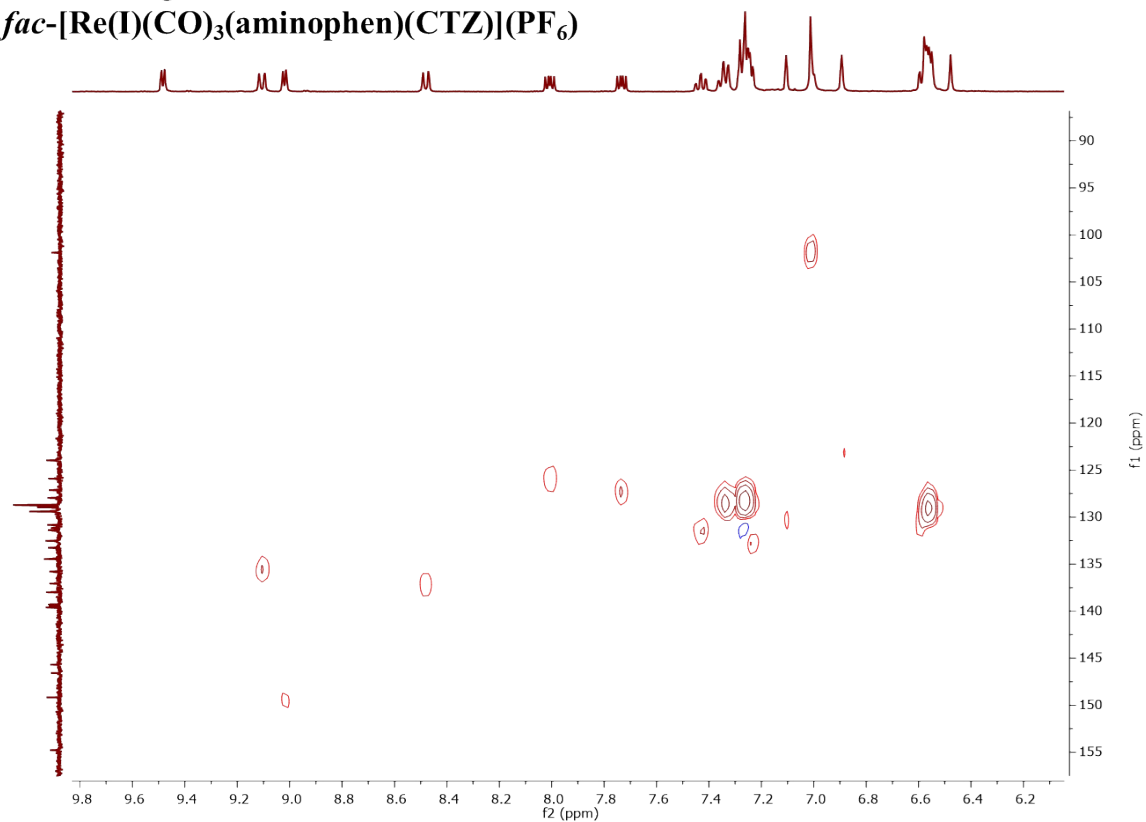

**Fig. S3.** (A)  $^1\text{H}$ -NMR spectra (B)  $^1\text{H}$ - $^1\text{H}$  NMR experiments and (C)  $^1\text{H}$ - $^{13}\text{C}$  NMR experiments for *fac*-[Re(I)(CO)<sub>3</sub>(aminophen)(CTZ)](PF<sub>6</sub>) complex.

**(A)  $^1\text{H}$ -RMN**  
*fac*-[Re(I)(CO)<sub>3</sub>(bipy)(CTZ)](PF<sub>6</sub>)

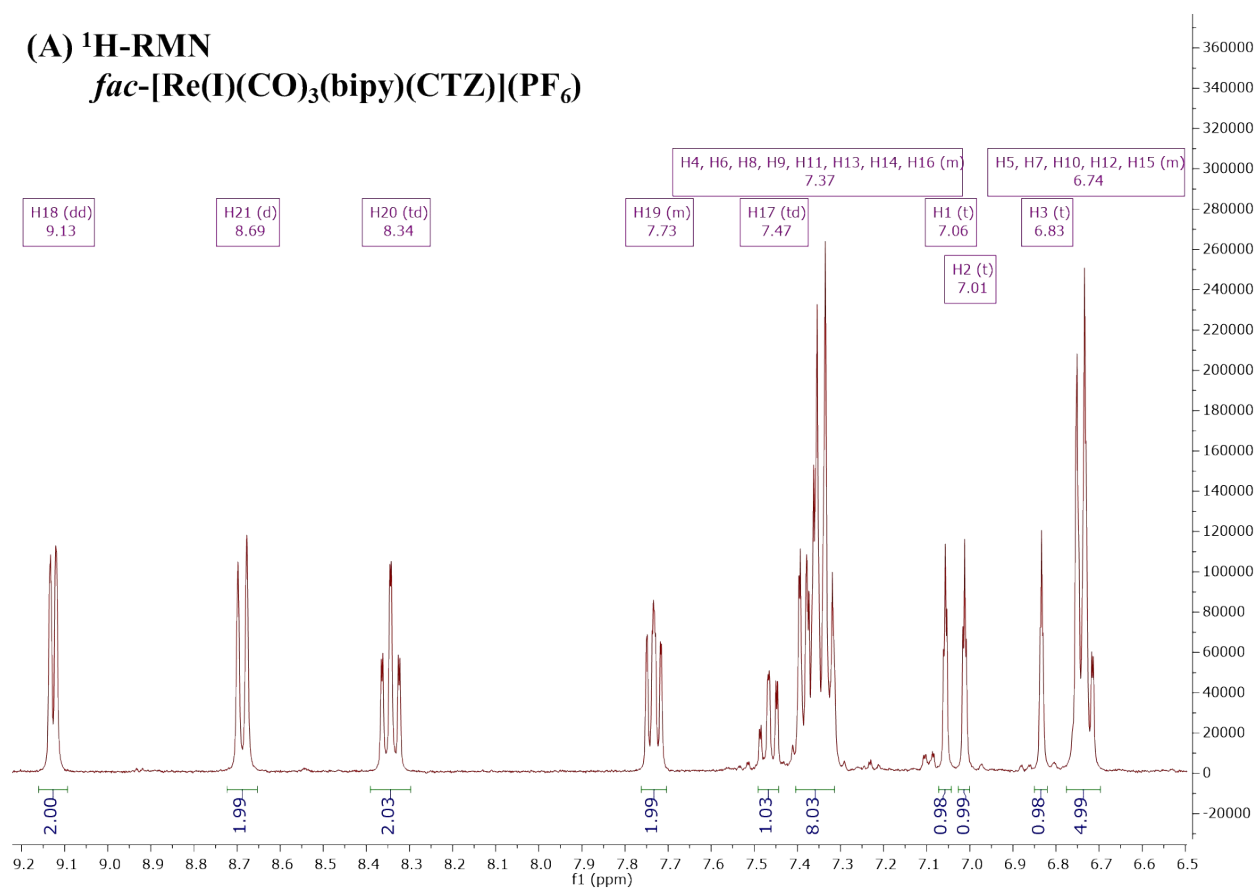

**(B)  $^1\text{H}$ - $^1\text{H}$ -COSY**  
*fac*-[Re(I)(CO)<sub>3</sub>(bipy)(CTZ)](PF<sub>6</sub>)

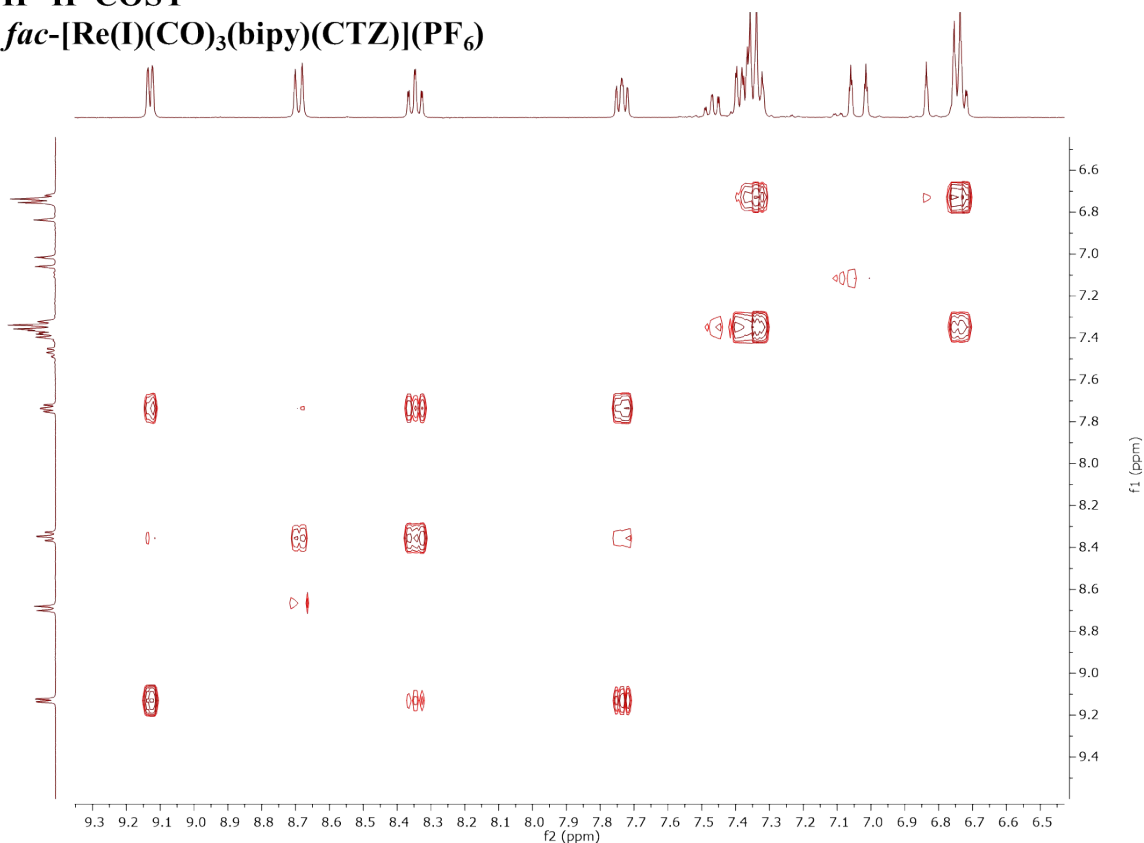

(C)  $^1\text{H}$ - $^{13}\text{C}$ - HSQC  
*fac*-[Re(I)(CO)<sub>3</sub>(bipy)(CTZ)](PF<sub>6</sub>)

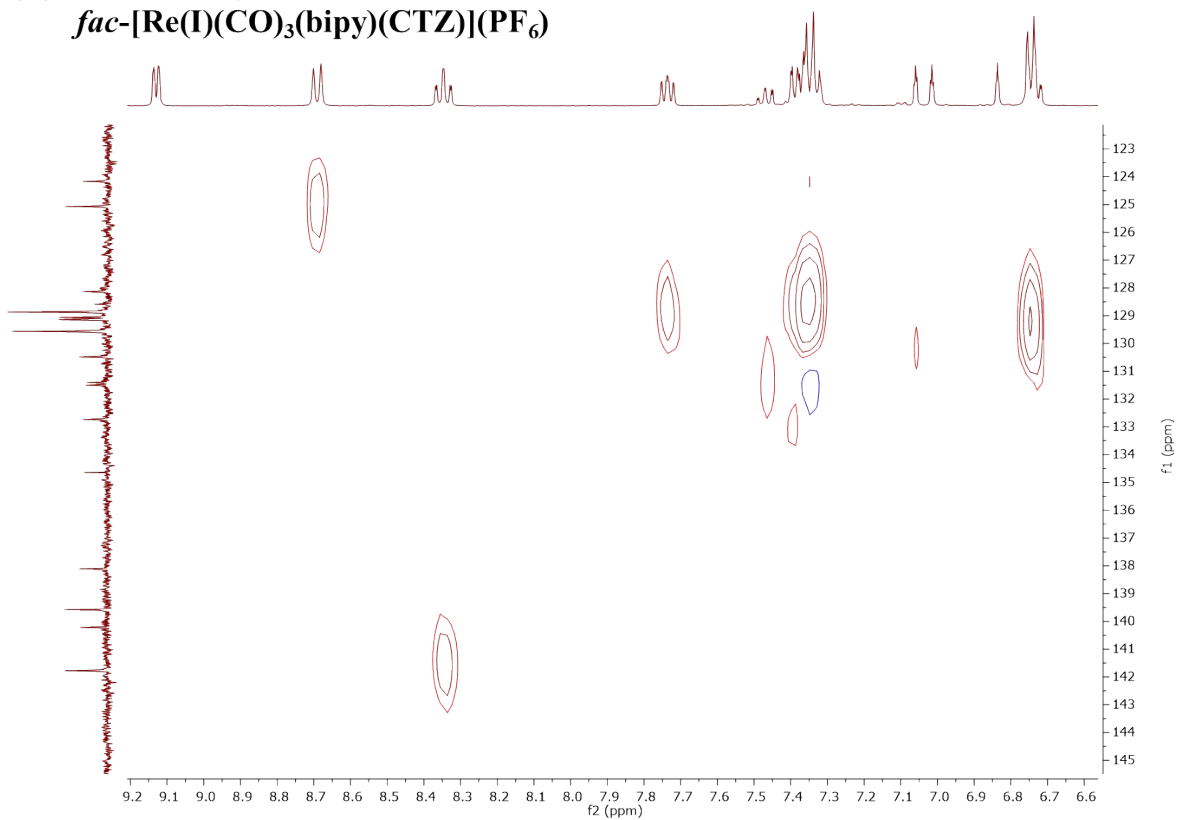

**Fig. S4.** (A)  $^1\text{H}$ -NMR spectra (B)  $^1\text{H}$ - $^1\text{H}$  NMR experiments and (C)  $^1\text{H}$ - $^{13}\text{C}$  NMR experiments for *fac*-[Re(I)(CO)<sub>3</sub>(bipy)(CTZ)](PF<sub>6</sub>) complex.

**(A)  $^1\text{H-NMR}$**   
***fac*-[Re(I)(CO)<sub>3</sub>(tmp)(CTZ)](PF<sub>6</sub>)**

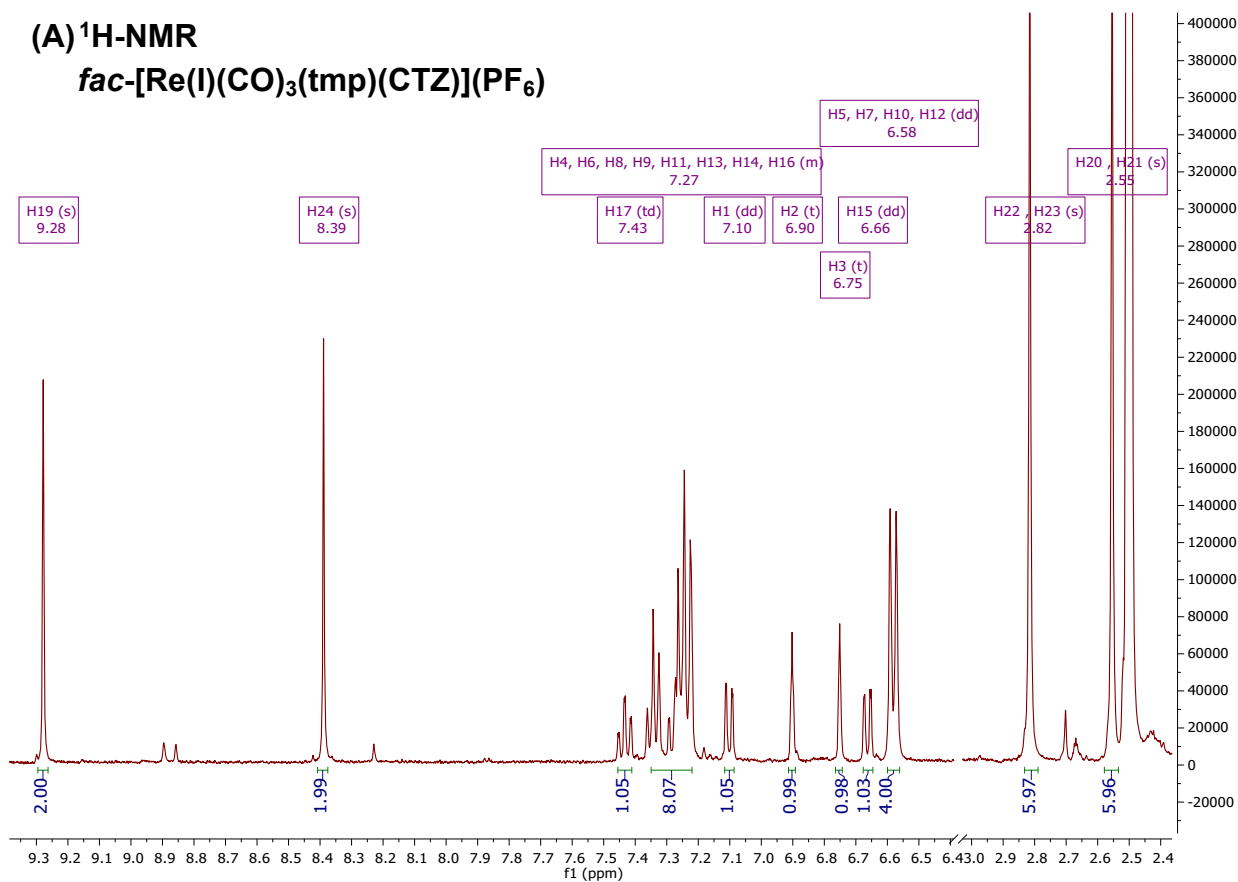

**(B)  $^1\text{H-}^1\text{H-COSY}$**   
***fac*-[Re(I)(CO)<sub>3</sub>(tmp)(CTZ)](PF<sub>6</sub>)**

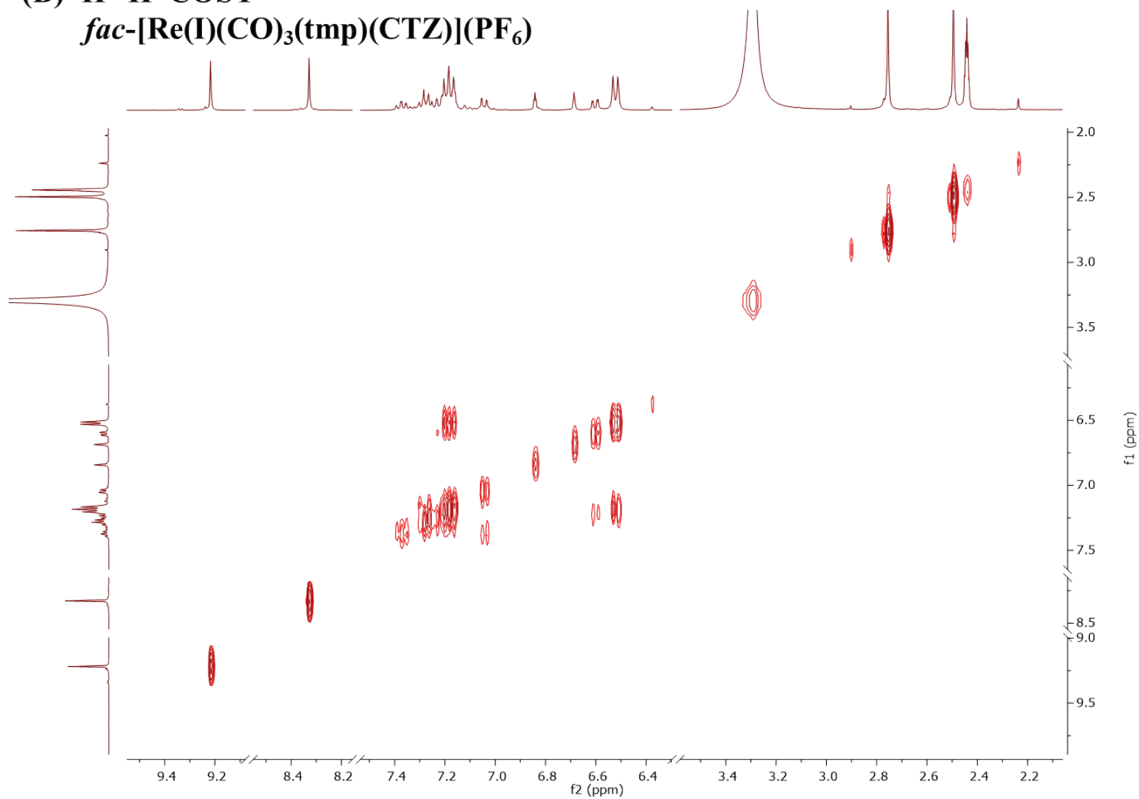



(C)  $^1\text{H}$ - $^{13}\text{C}$ - HSQC  
*fac*-[Re(I)(CO)<sub>3</sub>(tmp)(CTZ)](PF<sub>6</sub>)

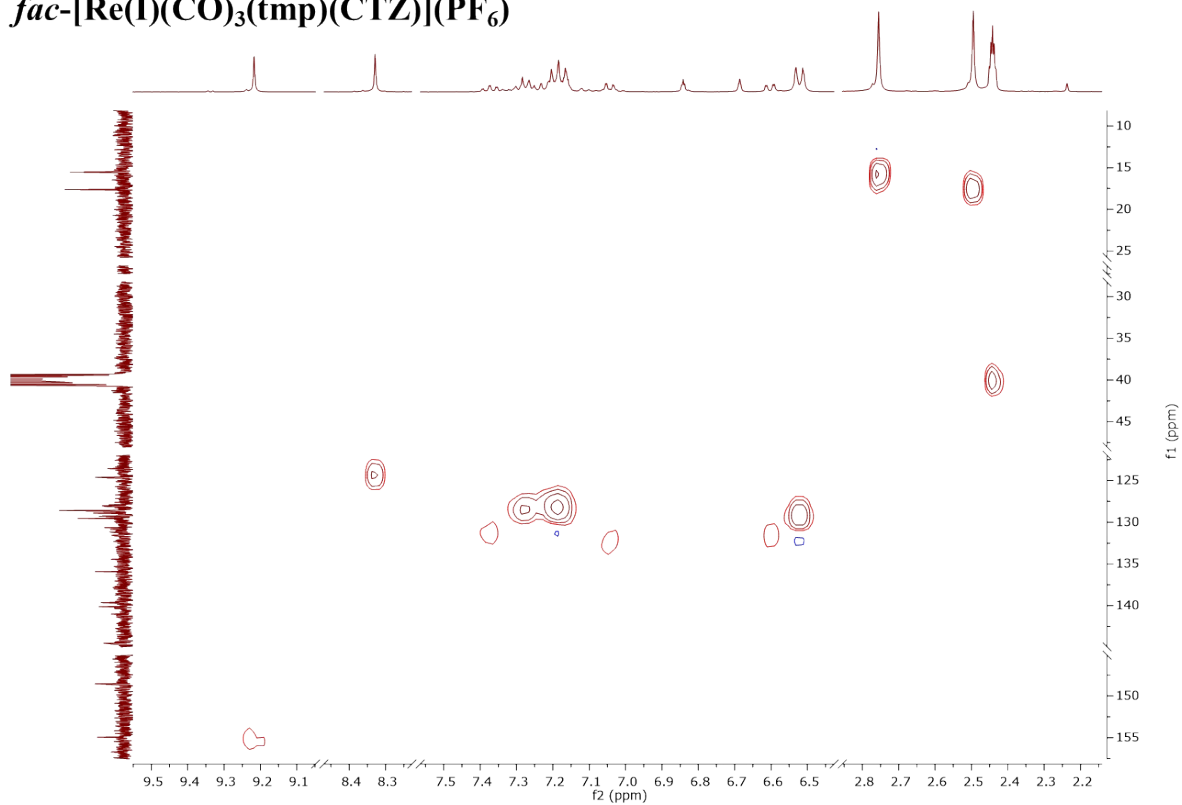

**Fig. S5.** (A)  $^1\text{H}$ -NMR spectra (B)  $^1\text{H}$ - $^1\text{H}$  NMR experiments and (C)  $^1\text{H}$ - $^{13}\text{C}$  NMR experiments for *fac*-[Re(I)(CO)<sub>3</sub>(tmp)(CTZ)](PF<sub>6</sub>) complex.

(A)  $^1\text{H}$ -RMN

*fac*-[Re(I)(CO)<sub>3</sub>(dmb)(CTZ)](PF<sub>6</sub>)

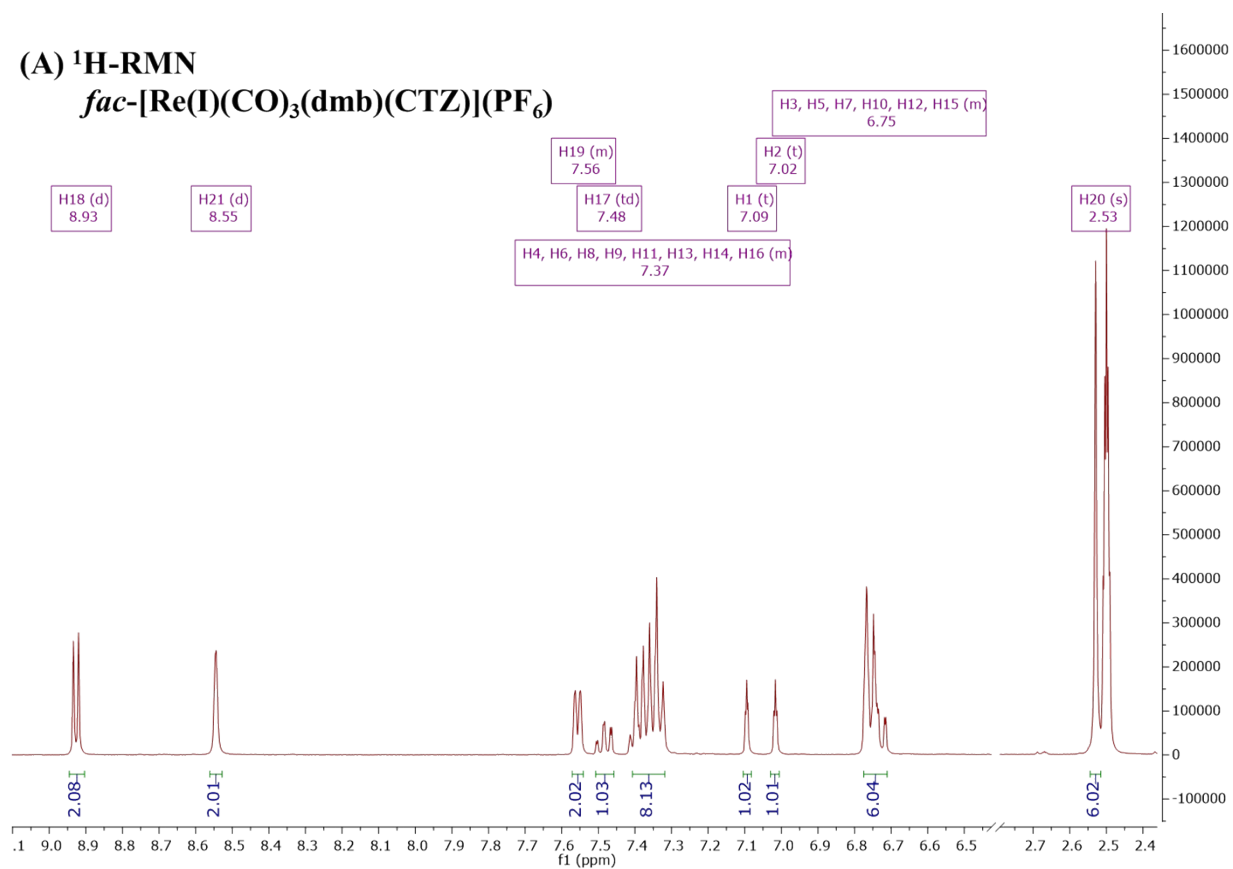

(B)  $^1\text{H}$ - $^1\text{H}$ -COSY

*fac*-[Re(I)(CO)<sub>3</sub>(dmb)(CTZ)](PF<sub>6</sub>)

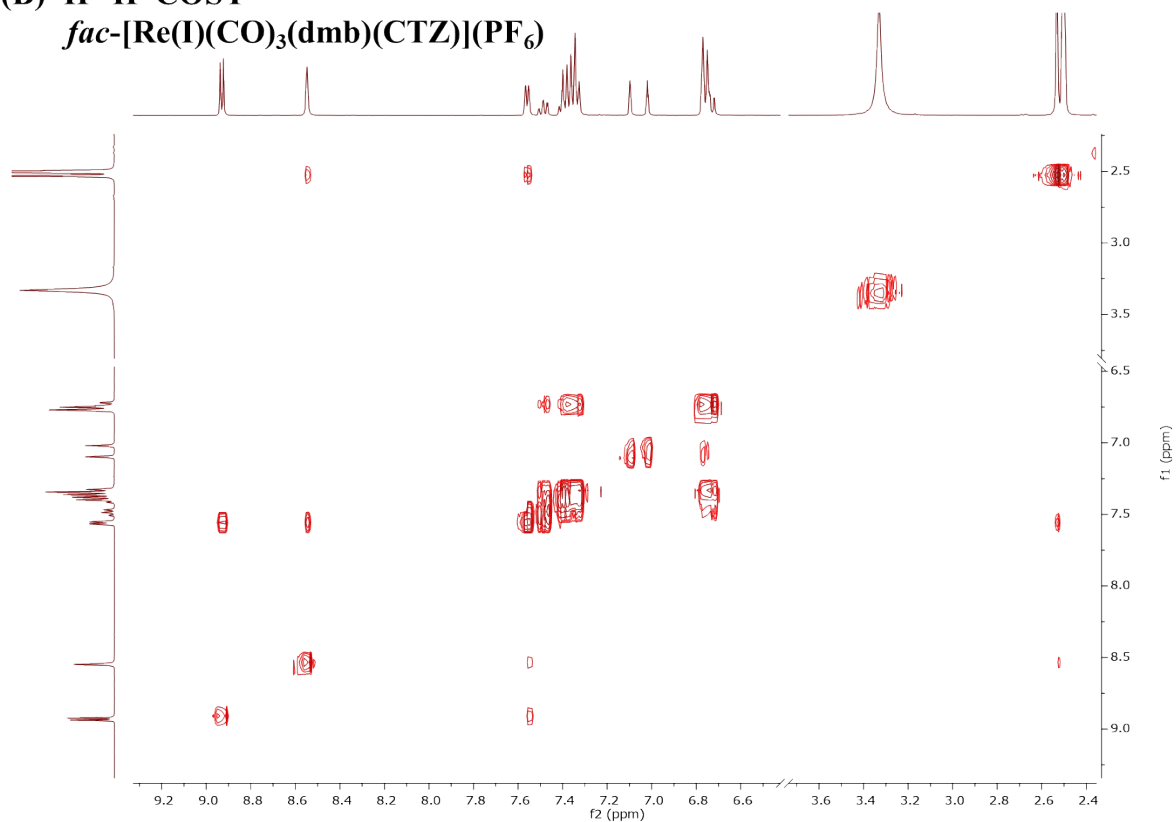

(C)  $^1\text{H}$ - $^{13}\text{C}$ -HSQC

*fac*- $[\text{Re}(\text{I})(\text{CO})_3(\text{dmb})(\text{CTZ})](\text{PF}_6)$

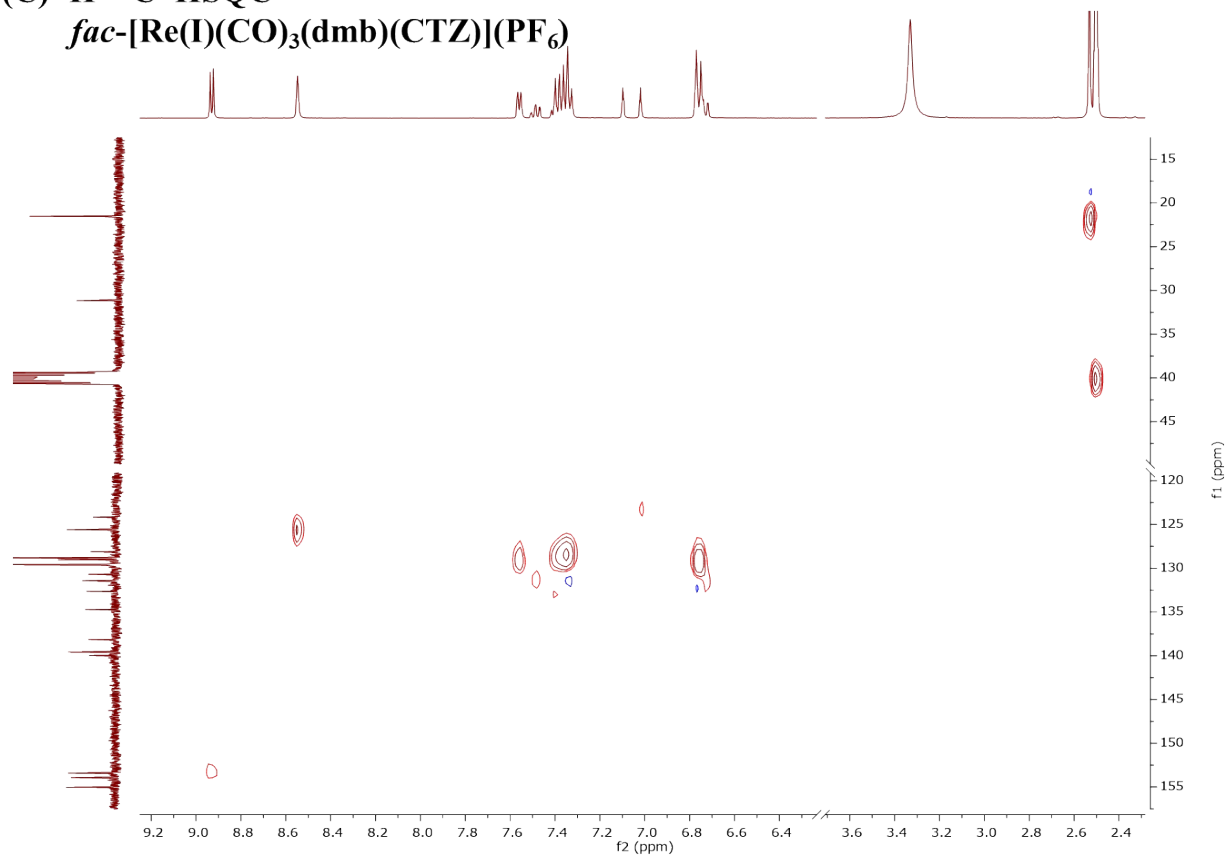

**Fig. S6.** (A)  $^1\text{H}$ -NMR spectra (B)  $^1\text{H}$ - $^1\text{H}$  NMR experiments and (C)  $^1\text{H}$ - $^{13}\text{C}$  NMR experiments for *fac*- $[\text{Re}(\text{I})(\text{CO})_3(\text{dmb})(\text{CTZ})](\text{PF}_6)$  complex.

(A)  $^1\text{H}$ -RMN

*fac*-[Re(I)(CO)<sub>3</sub>(tmp)(KTZ)](PF<sub>6</sub>)

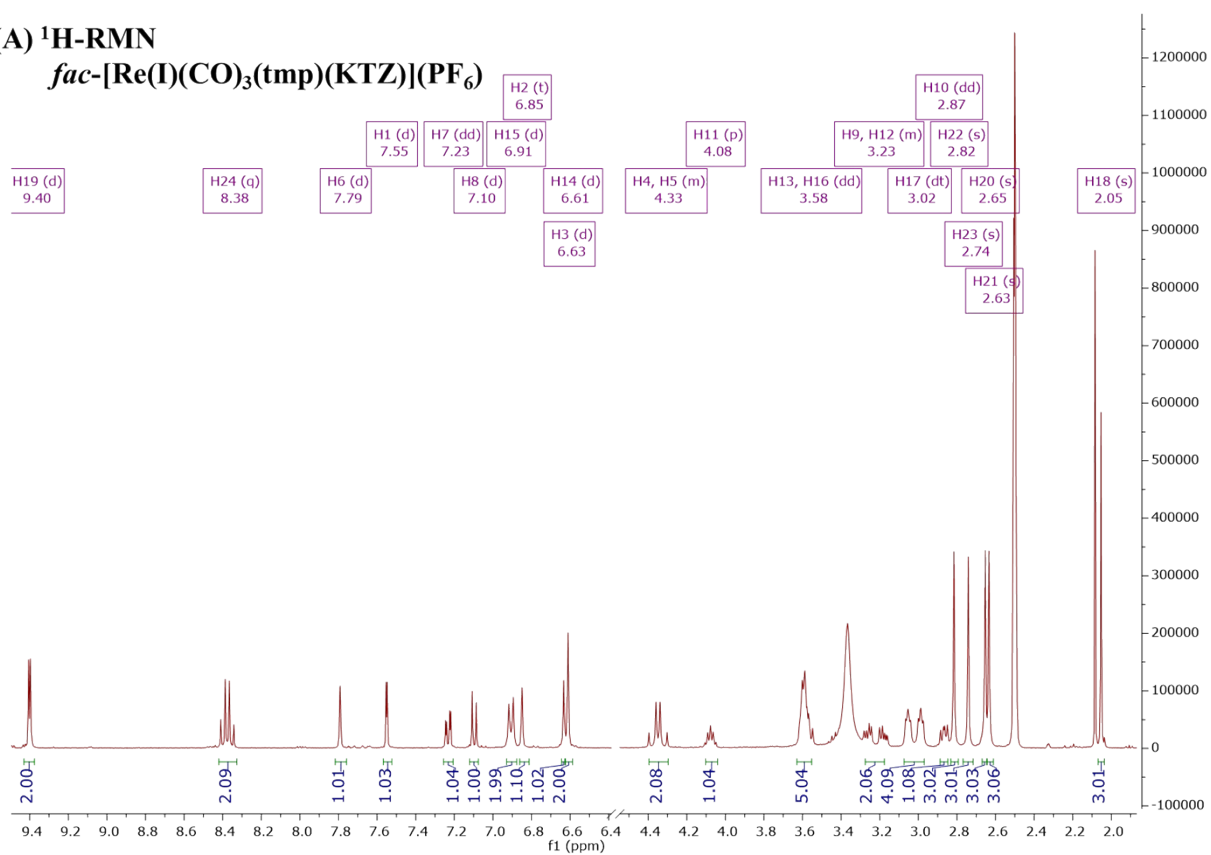

(B)  $^1\text{H}$ - $^1\text{H}$ -COSY

*fac*-[Re(I)(CO)<sub>3</sub>(tmp)(KTZ)](PF<sub>6</sub>)

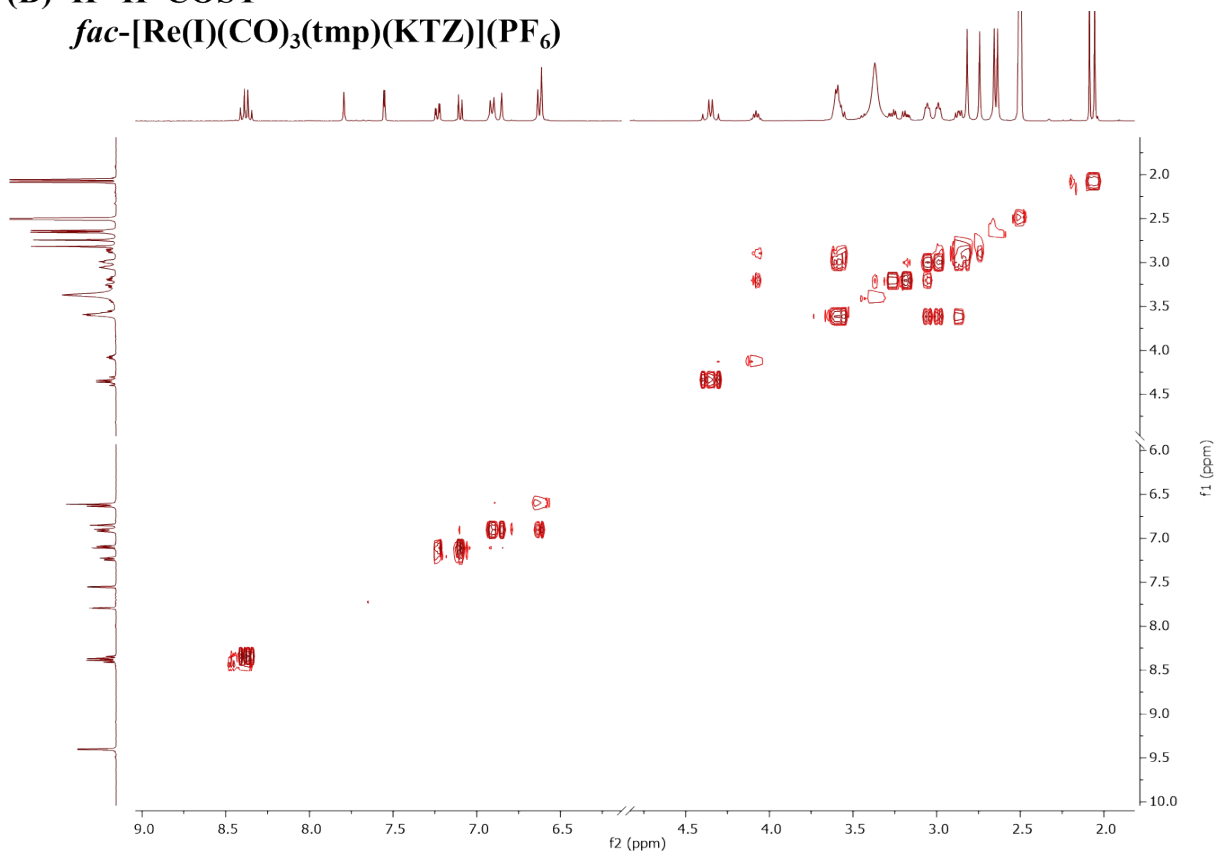

(C)  $^1\text{H}$ - $^{13}\text{C}$ -HSQC  
*fac*-[Re(I)(CO)<sub>3</sub>(tmp)(KTZ)](PF<sub>6</sub>)

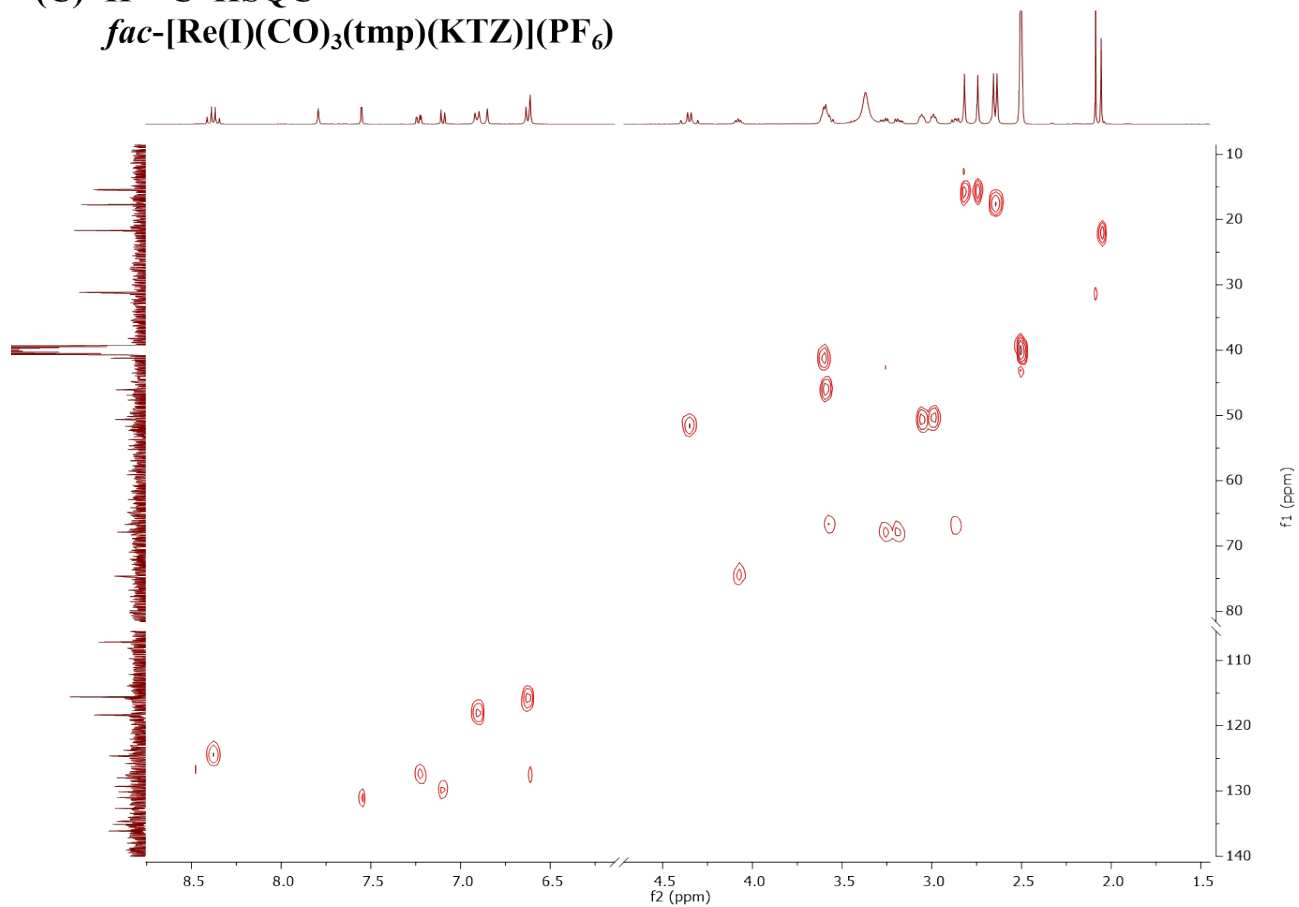

**Fig. S7.** (A)  $^1\text{H}$ -NMR spectra (B)  $^1\text{H}$ - $^1\text{H}$  NMR experiments and (C)  $^1\text{H}$ - $^{13}\text{C}$  NMR experiments for *fac*-[Re(I)(CO)<sub>3</sub>(tmp)(KTZ)](PF<sub>6</sub>) complex.

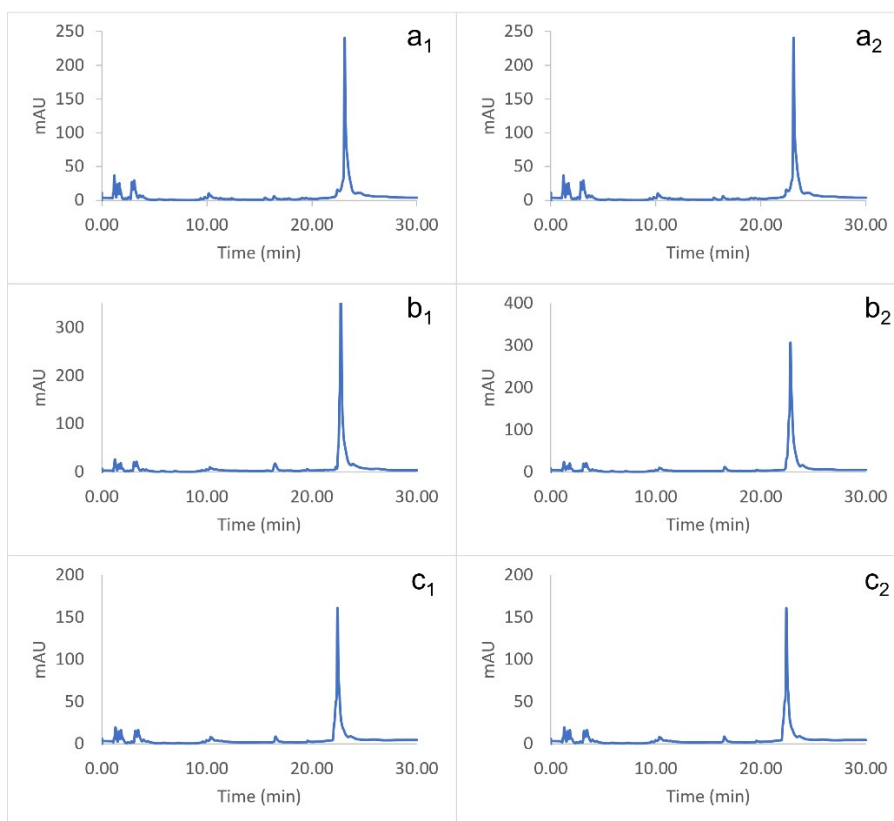

**Fig. S8.** Chromatograms obtained in DMSO:fetal bovine serum (50:50) for *fac*-[Re(I)(CO)<sub>3</sub>(aminophen)(CTZ)](PF<sub>6</sub>) (a), *fac*-[Re(I)(CO)<sub>3</sub>(dmb)(CTZ)](PF<sub>6</sub>) (b) and *fac*-[Re(I)(CO)<sub>3</sub>(bipy)(CTZ)](PF<sub>6</sub>) (c). Subscripts 1 and 2 correspond to  $t_1 = 0$  and  $t_2 = 1$  day, respectively.

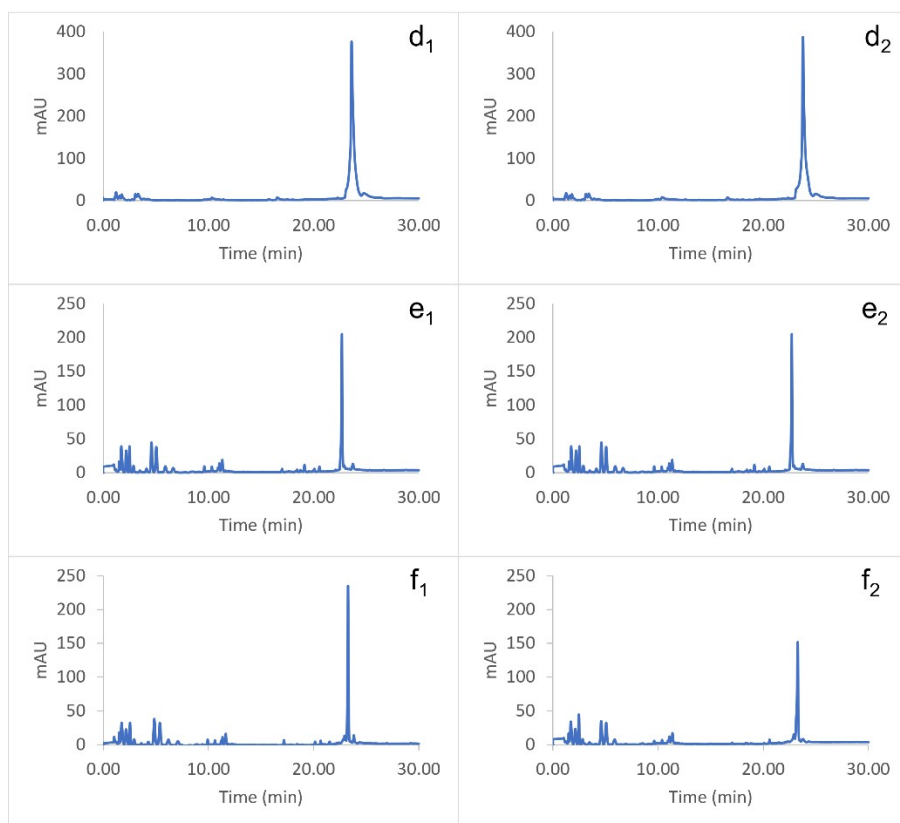

**Fig. S9.** Chromatograms obtained in DMSO:fetal bovine serum (50:50) for *fac*-[Re(I)(CO)<sub>3</sub>(tmp)(CTZ)](PF<sub>6</sub>) (d), *fac*-[Re(I)(CO)<sub>3</sub>(phen)(CTZ)](PF<sub>6</sub>) (e) and *fac*-[Re(I)(CO)<sub>3</sub>(tmp)(KTZ)](PF<sub>6</sub>) (f). Subscripts 1 and 2 correspond to  $t_1 = 0$  and  $t_2 = 1$  day, respectively.

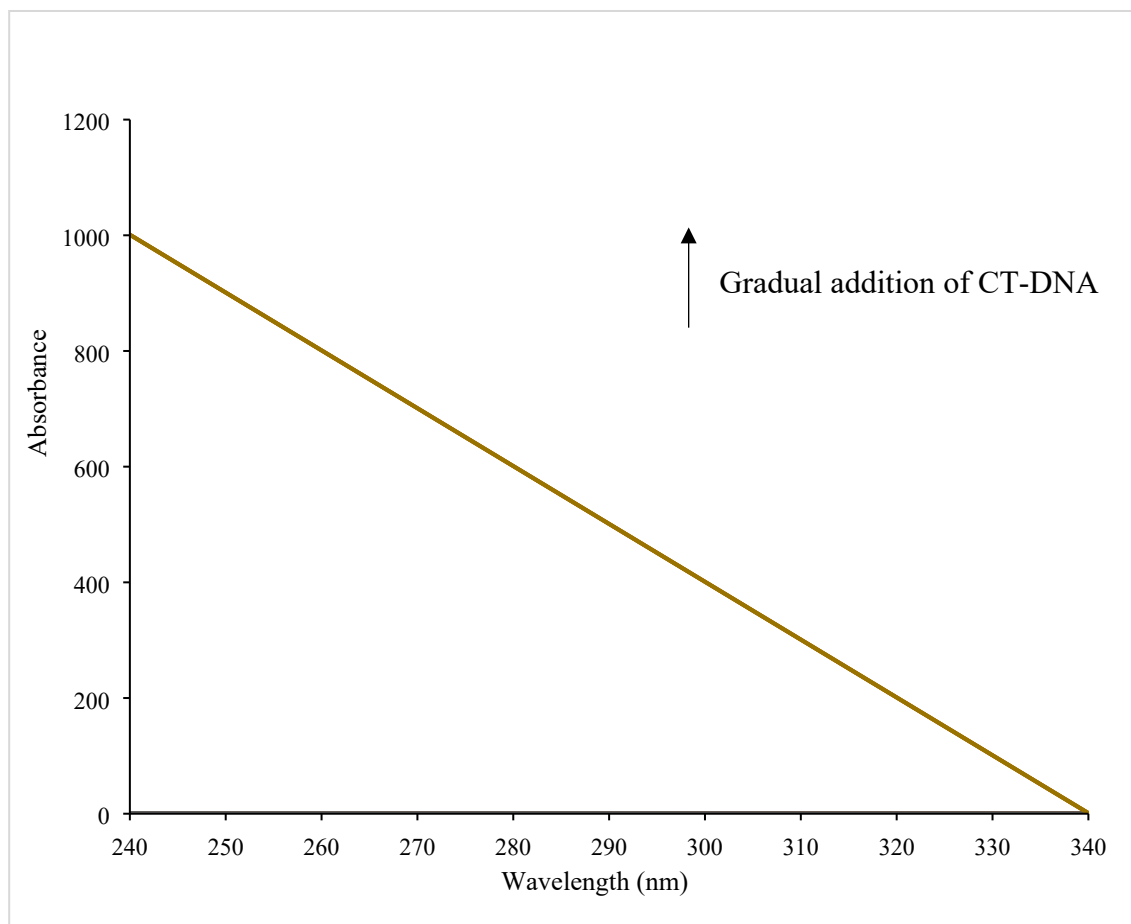

**Fig. S10.** Electronic absorption spectra of Re-CTZ-tmp in the absence (black line) and in the presence (color lines) of CT-DNA. The arrow shows the changes upon addition of increasing amount of CT-DNA. ( $C_{\text{DNA}} = 0\text{-}20 \mu\text{M}$ ,  $C_{\text{complex}} = 10 \mu\text{M}$ , samples prepared in DMSO/buffer Tris HCl medium, pH 7.4).



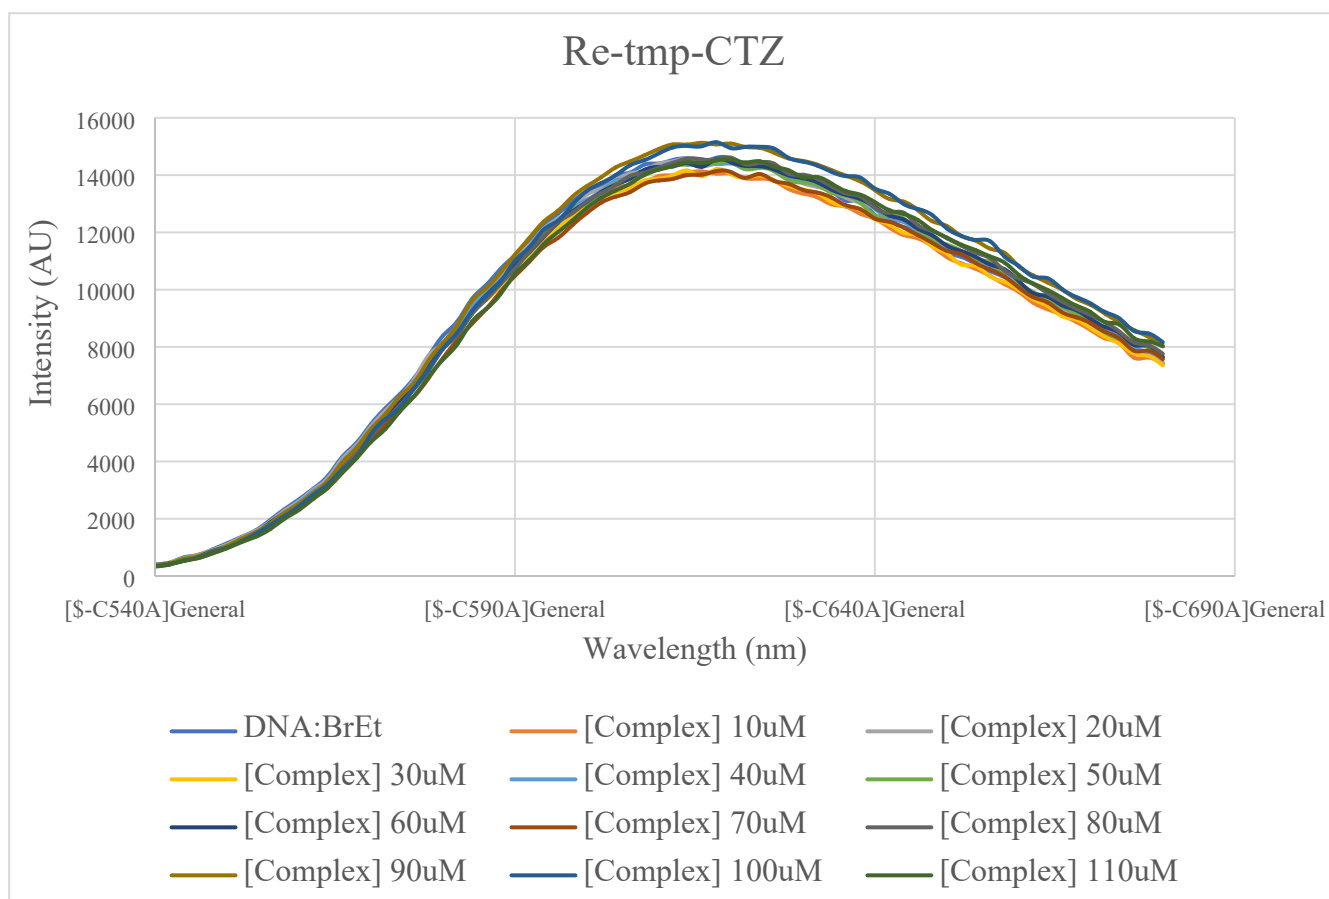

**Fig. S11.** Fluorescence data obtained for the competitive binding study of  $[\text{Re}(\text{CO})_3(\text{tmp})(\text{CTZ})]\text{PF}_6$  to {EB-DNA} adduct ( $\lambda_{\text{exc.}} = 510 \text{ nm}$ ).

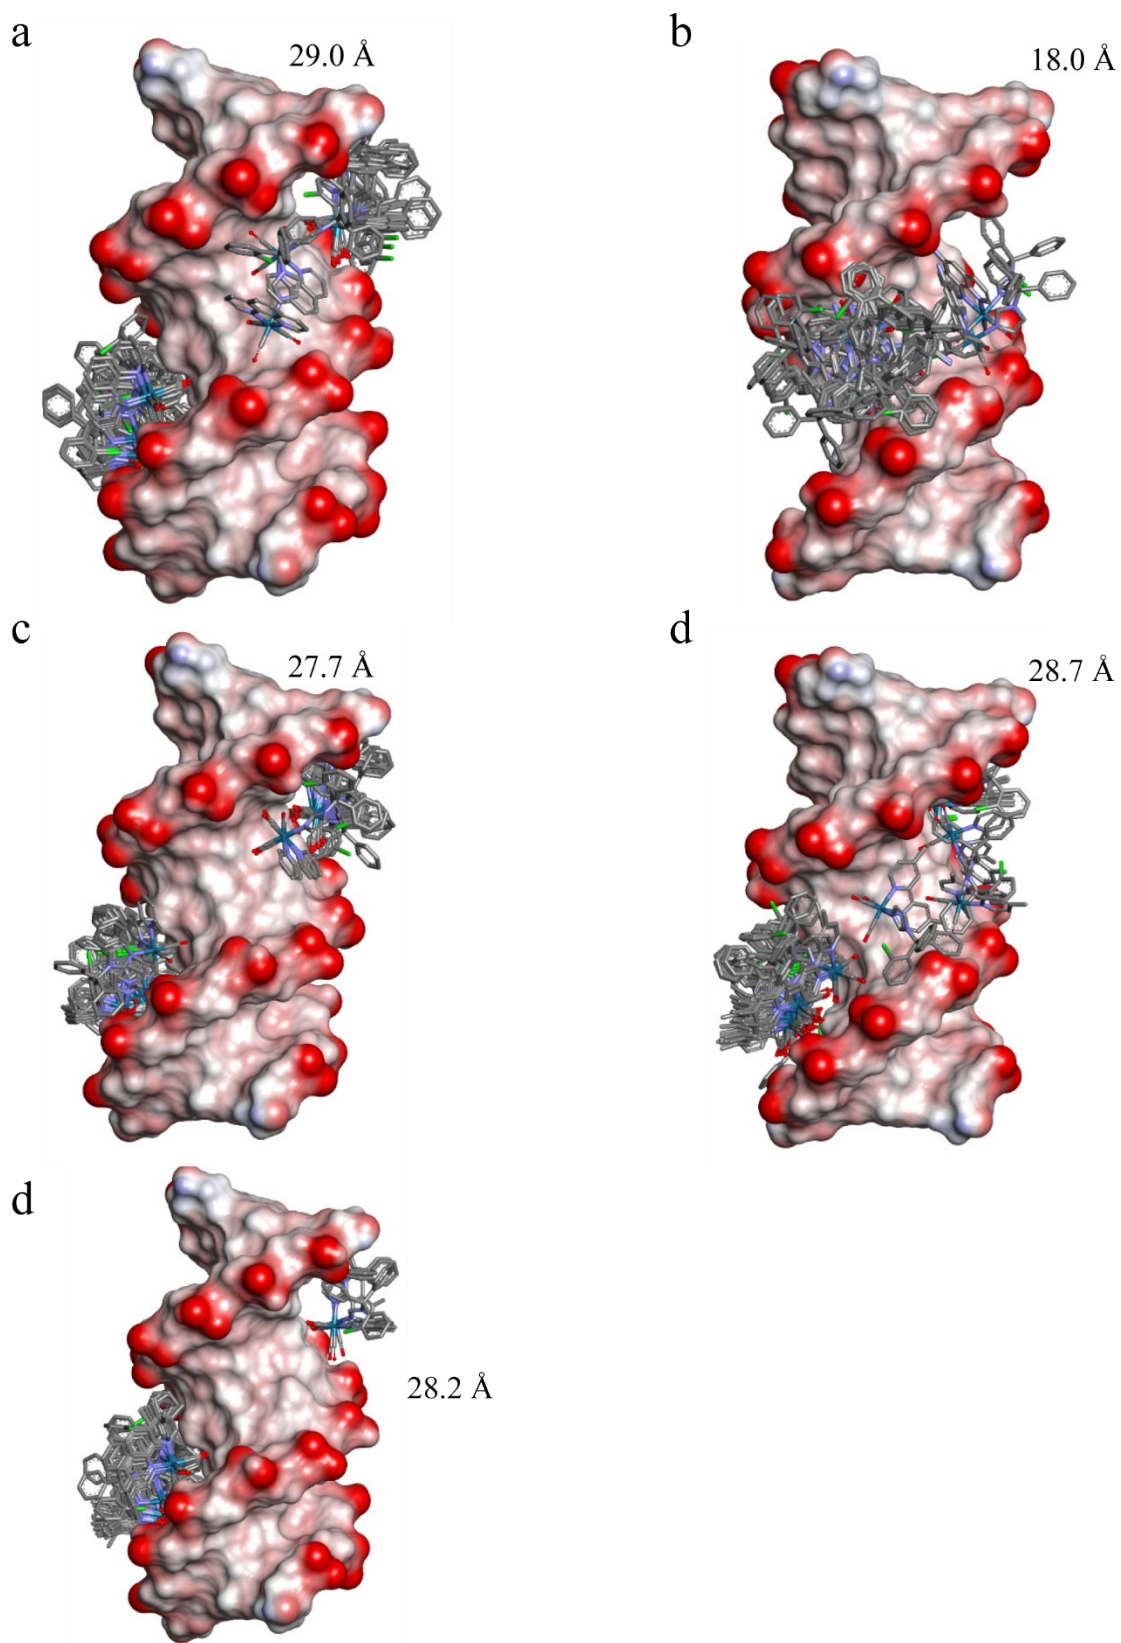

**Fig. S12.** Docking solutions for *fac*-[Re(I)(CO)<sub>3</sub>(NN)(CTZ)]<sup>+</sup> using CT-DNA as receptor. NN = phen (a), aminophen (b), bipy (c), dmb (d), tmp (e). The solvent-accessible surface is depicted for the receptor,

with the interpolated atomic charges mapped on it. The RMSD between the solutions is also depicted. Atom color code: C (grey), N (blue), O (red), Cl (green), H (white).

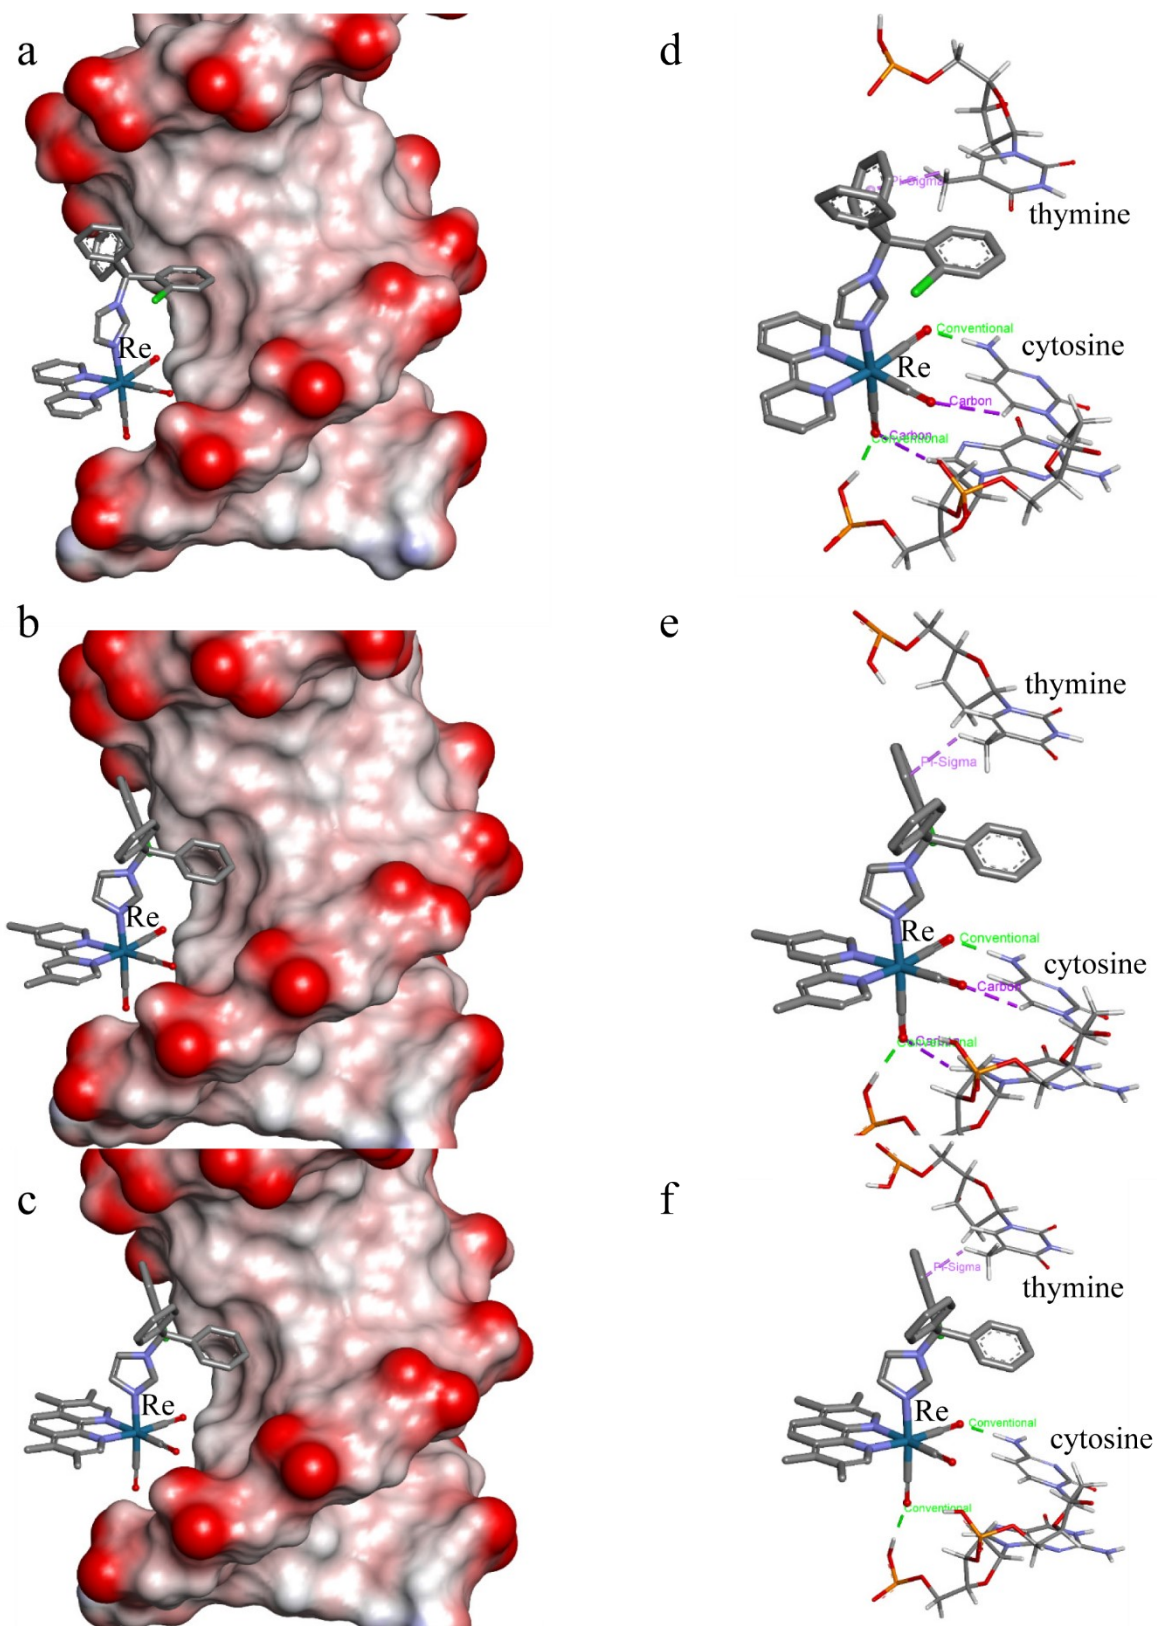

**Fig. S13.** Best ranking pose for *fac*-[Re(I)(CO)<sub>3</sub>(NN)(CTZ)]<sup>+</sup> docked into the major groove of CT-DNA. NN = bipy (a), dmb (b), tmp (c). In all cases, the solvent-accessible surface is depicted for the receptor, with the interpolated atomic charges mapped on it. In (d) - (f), the intermolecular interactions between the substrate and the ct-DNA are shown for (a) - (c), respectively. Pi-sigma = C-H- $\pi$  interaction;

conventional = conventional H-bond; Carbon = C-H H-bond. Atom color code: C (grey), N (blue), O (red), Cl (green), H (white).

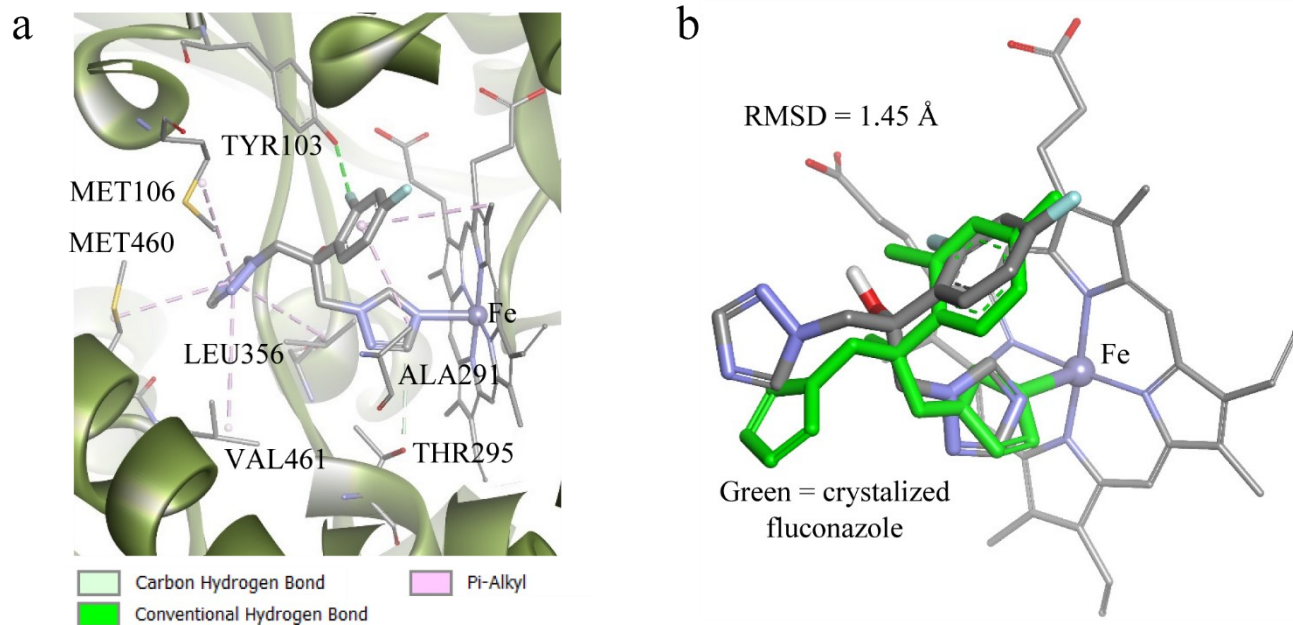

**Fig. S14.** a) Intermolecular interactions between the crystallized fluconazole and the receptor, represented as colored dashed lines. Atom color code: C (grey), N (blue), O (red), Cl (green), H (white). b) Redocking results for fluconazole. The crystallized fluconazole molecule is superimposed in green.
